# Supplementary material
Source: publisher figshare collection journal article supplement (https://acs.figshare.com/ndownloader/files/4780003)
Supplement: Supplementary file 1 [file 4780003]

 
data_am60a 
 
_audit_creation_method            SHELXL97 
_chemical_name_systematic 
; 
 cerium iron sulfide iodide 
; 
_chemical_name_common             'cerium iron sulfide iodide' 
_chemical_melting_point           ? 
_chemical_formula_moiety          'Ce53 Fe12 I3 S90' 
_chemical_formula_sum             'Ce53 Fe12 I3 S90' 
_chemical_formula_weight          11362.66 
 
loop_ 
 _atom_type_symbol 
 _atom_type_description 
 _atom_type_scat_dispersion_real 
 _atom_type_scat_dispersion_imag 
 _atom_type_scat_source 
 'S'  'S'   0.1246   0.1234 
 'International Tables Vol C Tables 4.2.6.8 and 6.1.1.4' 
 'Fe'  'Fe'   0.3463   0.8444 
 'International Tables Vol C Tables 4.2.6.8 and 6.1.1.4' 
 'Ce'  'Ce'  -0.2486   2.6331 
 'International Tables Vol C Tables 4.2.6.8 and 6.1.1.4' 
 'I'  'I'  -0.4742   1.8119 
 'International Tables Vol C Tables 4.2.6.8 and 6.1.1.4' 
 
_symmetry_cell_setting            rhombohedral 
_symmetry_space_group_name_H-M    'R -3 m' 
_symmetry_space_group_name_Hall   '-R 3 2"'
 
loop_ 
 _symmetry_equiv_pos_as_xyz 
 'x, y, z' 
 '-y, x-y, z' 
 '-x+y, -x, z' 
 'y, x, -z' 
 'x-y, -y, -z' 
 '-x, -x+y, -z' 
 'x+2/3, y+1/3, z+1/3' 
 '-y+2/3, x-y+1/3, z+1/3' 
 '-x+y+2/3, -x+1/3, z+1/3' 
 'y+2/3, x+1/3, -z+1/3' 
 'x-y+2/3, -y+1/3, -z+1/3' 
 '-x+2/3, -x+y+1/3, -z+1/3' 
 'x+1/3, y+2/3, z+2/3' 
 '-y+1/3, x-y+2/3, z+2/3' 
 '-x+y+1/3, -x+2/3, z+2/3' 
 'y+1/3, x+2/3, -z+2/3' 
 'x-y+1/3, -y+2/3, -z+2/3' 
 '-x+1/3, -x+y+2/3, -z+2/3' 
 '-x, -y, -z' 
 'y, -x+y, -z' 
 'x-y, x, -z' 
 '-y, -x, z' 
 '-x+y, y, z' 
 'x, x-y, z' 
 '-x+2/3, -y+1/3, -z+1/3' 
 'y+2/3, -x+y+1/3, -z+1/3' 
 'x-y+2/3, x+1/3, -z+1/3' 
 '-y+2/3, -x+1/3, z+1/3' 
 '-x+y+2/3, y+1/3, z+1/3' 
 'x+2/3, x-y+1/3, z+1/3' 
 '-x+1/3, -y+2/3, -z+2/3' 
 'y+1/3, -x+y+2/3, -z+2/3' 
 'x-y+1/3, x+2/3, -z+2/3' 
 '-y+1/3, -x+2/3, z+2/3' 
 '-x+y+1/3, y+2/3, z+2/3' 
 'x+1/3, x-y+2/3, z+2/3' 
 
_cell_length_a                    13.863(3) 
_cell_length_b                    13.863(3) 
_cell_length_c                    21.944(6) 
_cell_angle_alpha                 90.00 
_cell_angle_beta                  90.00 
_cell_angle_gamma                 120.00 
_cell_volume                      3652(2) 
_cell_formula_units_Z             1 
_cell_measurement_temperature     293(2) 
_cell_measurement_reflns_used     33275 
_cell_measurement_theta_min       1.93 
_cell_measurement_theta_max       27.29 
 
_exptl_crystal_description        prism 
_exptl_crystal_colour             black 
_exptl_crystal_size_max           0.15 
_exptl_crystal_size_mid           0.15 
_exptl_crystal_size_min           0.10
_exptl_crystal_density_meas       ? 
_exptl_crystal_density_diffrn     5.167 
_exptl_crystal_density_method     'not measured' 
_exptl_crystal_F_000              4985 
_exptl_crystal_preparation        'grown in a CeI3 flux' 
_exptl_absorpt_coefficient_mu     19.202 
_exptl_absorpt_correction_type    numerical 
_exptl_absorpt_correction_T_min   0.1261  
_exptl_absorpt_correction_T_max   0.2598 
_exptl_absorpt_process_details     
;
 X-RED (Stoe & Cie, 2001); crystal description optimized based on 
 equivalent reflections using X-SHAPE (Stoe & Cie, 1999)  
;
_exptl_special_details 
; 
 ? 
; 
 
_diffrn_ambient_temperature       293(2) 
_diffrn_radiation_wavelength      0.71073 
_diffrn_radiation_type            MoK\a 
_diffrn_radiation_source          'fine-focus sealed tube' 
_diffrn_radiation_monochromator   graphite 
_diffrn_measurement_device_type   'STOE IPDS-II' 
_diffrn_measurement_method        '\w scans' 
_diffrn_detector_area_resol_mean  ? 
_diffrn_standards_number          ? 
_diffrn_standards_interval_count  ? 
_diffrn_standards_interval_time   ? 
_diffrn_standards_decay_%         ? 
_diffrn_reflns_number             29416 
_diffrn_reflns_av_R_equivalents   0.0917 
_diffrn_reflns_av_sigmaI/netI     0.0204 
_diffrn_reflns_limit_h_min        -17 
_diffrn_reflns_limit_h_max        17 
_diffrn_reflns_limit_k_min        -17 
_diffrn_reflns_limit_k_max        17 
_diffrn_reflns_limit_l_min        -27 
_diffrn_reflns_limit_l_max        27 
_diffrn_reflns_theta_min          1.93 
_diffrn_reflns_theta_max          27.00 
_reflns_number_total              1003 
_reflns_number_gt                 999 
_reflns_threshold_expression      I>2\s(I) 
 
_computing_data_collection        'STOE X-AREA (Stoe & Cie, 1999)' 
_computing_cell_refinement        'STOE X-AREA (Stoe & Cie, 1999)' 
_computing_data_reduction         'STOE X-RED (Stoe & Cie, 2001)' 
_computing_structure_solution     'SHELXS97 (Sheldrick, 1997)' 
_computing_structure_refinement   'SHELXL97 (Sheldrick, 1997)' 
_computing_molecular_graphics     'DIAMOND (Brandenburg, 1999)' 
_computing_publication_material   'SHELXL97 (Sheldrick, 1997)' 
 
_refine_special_details 
; 
 Refinement of F^2^ against ALL reflections.  The weighted R-factor wR and 
 goodness of fit S are based on F^2^, conventional R-factors R are based 
 on F, with F set to zero for negative F^2^. The threshold expression of 
 F^2^ > 2sigma(F^2^) is used only for calculating R-factors(gt) etc. and is 
 not relevant to the choice of reflections for refinement.  R-factors based 
 on F^2^ are statistically about twice as large as those based on F, and R- 
 factors based on ALL data will be even larger. 
 
 The Ce(1) atom is positionally disordered over eight sites (CE1A-H) with a 
 total occupancy of 17/18.
; 
 
_refine_ls_structure_factor_coef  Fsqd  
_refine_ls_matrix_type            full 
_refine_ls_weighting_scheme       calc  
_refine_ls_weighting_details 
 'calc w=1/[\s^2^(Fo^2^)+(0.0257P)^2^+183.1666P] where P=(Fo^2^+2Fc^2^)/3' 
_atom_sites_solution_primary      direct 
_atom_sites_solution_secondary    difmap 
_refine_ls_extinction_method      SHELXL97 
_refine_ls_extinction_coef        0.000204(15) 
_refine_ls_extinction_expression 
 'Fc^*^=kFc[1+0.001xFc^2^\l^3^/sin(2\q)]^-1/4^' 
_refine_ls_number_reflns          1003 
_refine_ls_number_parameters      73 
_refine_ls_number_restraints      1 
_refine_ls_R_factor_all           0.0333 
_refine_ls_R_factor_gt            0.0332 
_refine_ls_wR_factor_ref          0.0777 
_refine_ls_wR_factor_gt           0.0776 
_refine_ls_goodness_of_fit_ref    1.212 
_refine_ls_restrained_S_all       1.212 
_refine_ls_shift/su_max           0.001 
_refine_ls_shift/su_mean          0.000 
 
loop_ 
 _atom_site_label 
 _atom_site_type_symbol 
 _atom_site_fract_x 
 _atom_site_fract_y 
 _atom_site_fract_z 
 _atom_site_U_iso_or_equiv 
 _atom_site_adp_type 
 _atom_site_occupancy 
 _atom_site_symmetry_multiplicity 
 _atom_site_calc_flag 
 _atom_site_refinement_flags 
 _atom_site_disorder_assembly 
 _atom_site_disorder_group 
Ce1A Ce 0.1388(2) 0.2776(4) 0.3805(4) 0.0164(3) Uiso 0.166(6) 2 d SP . . 
Ce1B Ce 0.1283(5) 0.2566(10) 0.4030(8) 0.0164(3) Uiso 0.35(3) 2 d SP . . 
Ce1C Ce 0.1217(4) 0.2433(8) 0.4138(6) 0.0164(3) Uiso 0.27(3) 2 d SP . . 
Ce1D Ce 0.072(2) 0.144(5) 0.4450(19) 0.0164(3) Uiso 0.028(7) 2 d SP . . 
Ce1E Ce 0.0851(18) 0.170(4) 0.4546(17) 0.0164(3) Uiso 0.036(7) 2 d SP . . 
Ce1F Ce 0.0747(16) 0.149(3) 0.478(2) 0.0164(3) Uiso 0.021(2) 2 d SP . . 
Ce1G Ce 0.0460(5) 0.0919(10) 0.4950(4) 0.0164(3) Uiso 0.0577(16) 2 d SP . . 
Ce1H Ce 0.0000 0.0000 0.5000 0.0164(3) Uiso 0.079(4) 12 d SP . . 
Ce2 Ce 0.46973(2) 0.53027(2) 0.41137(2) 0.01465(19) Uani 1 2 d S . . 
Ce3 Ce 0.53652(2) 0.46348(2) 0.23889(2) 0.01452(19) Uani 1 2 d S . . 
Fe1 Fe 0.0000 0.0000 0.18814(13) 0.0199(5) Uani 1 6 d S . . 
Fe2 Fe 0.0000 0.0000 0.32854(14) 0.0229(6) Uani 1 6 d S . . 
S1 S 0.41946(13) 0.58054(13) 0.28134(18) 0.0397(8) Uani 1 2 d S . . 
S2 S 0.57924(11) 0.42076(11) 0.07215(14) 0.0255(6) Uani 1 2 d S . . 
S3 S 0.75611(10) 0.24389(10) 0.20039(11) 0.0160(5) Uani 1 2 d S . . 
S4 S 0.2925(3) 0.0000 0.5000 0.0378(8) Uani 1 2 d S . . 
S5 S 0.29550(19) 0.0000 0.0000 0.0184(5) Uani 1 2 d S . . 
I1 I 0.0000 0.0000 0.0000 0.0382(5) Uani 1 12 d S . . 
 
loop_ 
 _atom_site_aniso_label 
 _atom_site_aniso_U_11 
 _atom_site_aniso_U_22 
 _atom_site_aniso_U_33 
 _atom_site_aniso_U_23 
 _atom_site_aniso_U_13 
 _atom_site_aniso_U_12 
Ce2 0.0133(2) 0.0133(2) 0.0195(3) -0.00114(9) 0.00114(9) 0.0083(2) 
Ce3 0.0110(2) 0.0110(2) 0.0190(3) -0.00055(10) 0.00055(10) 0.0036(2) 
Fe1 0.0162(8) 0.0162(8) 0.0273(13) 0.000 0.000 0.0081(4) 
Fe2 0.0146(8) 0.0146(8) 0.0395(16) 0.000 0.000 0.0073(4) 
S1 0.0332(12) 0.0332(12) 0.062(2) -0.0053(7) 0.0053(7) 0.0232(14) 
S2 0.0131(8) 0.0131(8) 0.0455(16) -0.0022(6) 0.0022(6) 0.0031(9) 
S3 0.0151(8) 0.0151(8) 0.0180(10) 0.0000(4) 0.0000(4) 0.0076(9) 
S4 0.0570(17) 0.0184(13) 0.0252(13) 0.0098(11) 0.0049(5) 0.0092(7) 
S5 0.0230(9) 0.0152(11) 0.0142(10) -0.0024(9) -0.0012(4) 0.0076(6) 
I1 0.0501(8) 0.0501(8) 0.0144(8) 0.000 0.000 0.0251(4) 
 
_geom_special_details 
; 
 All esds (except the esd in the dihedral angle between two l.s. planes) 
 are estimated using the full covariance matrix.  The cell esds are taken 
 into account individually in the estimation of esds in distances, angles 
 and torsion angles; correlations between esds in cell parameters are only 
 used when they are defined by crystal symmetry.  An approximate (isotropic) 
 treatment of cell esds is used for estimating esds involving l.s. planes. 
; 
 
loop_ 
 _geom_bond_atom_site_label_1 
 _geom_bond_atom_site_label_2 
 _geom_bond_distance 
 _geom_bond_site_symmetry_2 
 _geom_bond_publ_flag 
Ce1A S2 2.630(5) 8 ? 
Ce1A S2 2.894(8) 26_455 ? 
Ce1A S1 2.916(5) 31 ? 
Ce1A S1 2.916(5) 33_545 ? 
Ce1A S5 3.091(5) 25 ? 
Ce1A S5 3.091(5) 7_455 ? 
Ce1A S4 3.320(8) 21_556 ? 
Ce1A S4 3.320(8) 2 ? 
Ce1A Fe2 3.522(4) . ? 
Ce1A Ce2 4.208(3) . ? 
Ce1A Ce2 4.208(3) 3_565 ? 
Ce1A Ce2 4.297(5) 31 ? 
Ce1A Ce2 4.297(5) 33_545 ? 
Ce1B S1 2.747(6) 31 ? 
Ce1B S1 2.747(6) 33_545 ? 
Ce1B S2 2.824(12) 8 ? 
Ce1B S4 2.971(12) 21_556 ? 
Ce1B S4 2.971(12) 2 ? 
Ce1B S2 3.263(15) 26_455 ? 
Ce1B S5 3.350(12) 25 ? 
Ce1B S5 3.350(12) 7_455 ? 
Ce1B Fe2 3.487(3) . ? 
Ce1B Ce3 4.126(12) 8 ? 
Ce1B Ce3 4.308(4) 31 ? 
Ce1B Ce3 4.308(4) 33_545 ? 
Ce1B Ce2 4.344(8) . ? 
Ce1C S1 2.675(5) 31 ? 
Ce1C S1 2.675(5) 33_545 ? 
Ce1C S4 2.835(8) 21_556 ? 
Ce1C S4 2.835(8) 2 ? 
Ce1C S2 2.989(11) 8 ? 
Ce1C S2 3.448(12) 26_455 ? 
Ce1C Fe2 3.469(4) . ? 
Ce1C S5 3.510(10) 25 ? 
Ce1C S5 3.510(10) 7_455 ? 
Ce1C Ce3 3.990(8) 8 ? 
Ce1C Ce3 4.263(2) 31 ? 
Ce1C Ce3 4.263(2) 33_545 ? 
Ce1C Ce2 4.463(8) . ? 
Ce1D S1 2.33(4) 31 ? 
Ce1D S1 2.33(4) 33_545 ? 
Ce1D S4 2.96(5) 21_556 ? 
Ce1D S4 2.96(5) 2 ? 
Ce1D Fe2 3.09(6) . ? 
Ce1D S1 3.74(4) 8 ? 
Ce1D S1 4.02(6) 32_445 ? 
Ce1D S2 4.05(4) 26_455 ? 
Ce1D Ce3 4.21(6) 8 ? 
Ce1E S1 2.56(3) 31 ? 
Ce1E S1 2.56(3) 33_545 ? 
Ce1E S4 2.69(3) 21_556 ? 
Ce1E S4 2.69(3) 2 ? 
Ce1E Fe2 3.44(5) . ? 
Ce1E S1 3.51(4) 8 ? 
Ce1E Ce3 3.83(5) 8 ? 
Ce1E S2 4.01(4) 8 ? 
Ce1E S2 4.24(4) 26_455 ? 
Ce1E Ce3 4.284(5) 31 ? 
Ce1F S4 2.70(2) 21_556 ? 
Ce1F S4 2.70(2) 2 ? 
Ce1F S1 2.81(3) 31 ? 
Ce1F S1 2.81(3) 33_545 ? 
Ce1F S1 3.02(4) 8 ? 
Ce1F Ce3 3.72(3) 8 ? 
Ce1F Fe2 3.73(3) . ? 
Ce1F S1 4.36(3) 32_445 ? 
Ce1F S2 4.40(4) 8 ? 
Ce1G S1 2.797(10) 8 ? 
Ce1G S1 3.001(8) 31 ? 
Ce1G S1 3.001(8) 33_545 ? 
Ce1G S4 3.150(10) 21_556 ? 
Ce1G S4 3.150(10) 2 ? 
Ce1G Fe2 3.816(10) . ? 
Ce1G S1 3.830(10) 7_445 ? 
Ce1G S1 3.830(10) 9_455 ? 
Ce1G S1 3.981(11) 32_445 ? 
Ce1H S1 3.257(4) 31 ? 
Ce1H S1 3.257(4) 7_445 ? 
Ce1H S1 3.257(4) 32_445 ? 
Ce1H S1 3.257(4) 8 ? 
Ce1H S1 3.257(4) 9_455 ? 
Ce1H S1 3.257(4) 33_545 ? 
Ce1H Fe2 3.762(3) 19_556 ? 
Ce1H Fe2 3.762(3) . ? 
Ce1H S4 4.055(4) 21_556 ? 
Ce1H S4 4.055(4) 3 ? 
Ce1H S4 4.055(4) . ? 
Ce1H S4 4.055(4) 2 ? 
Ce1H S4 4.055(4) 20_556 ? 
Ce1H S4 4.055(4) 19_556 ? 
Ce2 S3 2.848(2) 31_655 ? 
Ce2 S2 2.8765(9) 8 ? 
Ce2 S2 2.8765(9) 9_565 ? 
Ce2 S3 2.912(2) 7_455 ? 
Ce2 S5 2.9192(7) 25 ? 
Ce2 S5 2.9192(7) 8 ? 
Ce2 S1 3.098(4) . ? 
Ce2 S4 3.547(3) 3_665 ? 
Ce2 S4 3.547(3) 21_556 ? 
Ce2 Fe1 3.5912(15) 31 ? 
Ce2 Fe2 3.6481(16) 31 ? 
Ce2 Ce3 4.1106(12) . ? 
Ce2 Ce2 4.1526(15) 19_666 ? 
Ce2 Ce3 4.1807(11) 32 ? 
Ce3 S3 2.8948(11) 2_655 ? 
Ce3 S3 2.8948(11) 3_665 ? 
Ce3 S4 2.9139(7) 32 ? 
Ce3 S4 2.9139(7) 13_554 ? 
Ce3 S5 2.9443(14) 8 ? 
Ce3 S5 2.9443(14) 25 ? 
Ce3 S1 2.961(3) . ? 
Ce3 Ce1F 3.72(3) 15_554 ? 
Ce3 Fe1 3.7406(18) 25 ? 
Ce3 I1 3.7497(9) 7 ? 
Ce3 S2 3.800(3) . ? 
Ce3 Ce1E 3.83(5) 15_554 ? 
Ce3 Ce1C 3.990(8) 15_554 ? 
Fe1 S3 2.466(3) 26_455 ? 
Fe1 S3 2.466(3) 27_445 ? 
Fe1 S3 2.466(3) 25 ? 
Fe1 S2 2.641(3) 25 ? 
Fe1 S2 2.641(3) 26_455 ? 
Fe1 S2 2.641(3) 27_445 ? 
Fe1 Fe2 3.081(4) . ? 
Fe1 Ce2 3.5912(15) 31 ? 
Fe1 Ce2 3.5913(15) 33_545 ? 
Fe1 Ce2 3.5913(15) 32_445 ? 
Fe1 Ce3 3.7406(18) 25 ? 
Fe1 Ce3 3.7406(18) 27_445 ? 
Fe1 Ce3 3.7406(18) 26_455 ? 
Fe2 S1 2.414(4) 31 ? 
Fe2 S1 2.414(4) 33_545 ? 
Fe2 S1 2.414(4) 32_445 ? 
Fe2 S2 2.567(3) 25 ? 
Fe2 S2 2.567(3) 27_445 ? 
Fe2 S2 2.567(3) 26_455 ? 
Fe2 Ce1D 3.09(6) 3 ? 
Fe2 Ce1D 3.09(6) 2 ? 
Fe2 Ce1E 3.44(5) 3 ? 
Fe2 Ce1E 3.44(5) 2 ? 
S1 Ce1D 2.33(4) 32 ? 
S1 Ce1D 2.33(4) 31 ? 
S1 Fe2 2.414(4) 31 ? 
S1 Ce1E 2.56(3) 32 ? 
S1 Ce1E 2.56(3) 31 ? 
S1 Ce1C 2.675(5) 31 ? 
S1 Ce1C 2.675(5) 32 ? 
S1 Ce1B 2.747(6) 32 ? 
S1 Ce1B 2.747(6) 31 ? 
S1 Ce1G 2.797(10) 15_554 ? 
S1 Ce1F 2.81(3) 32 ? 
S1 Ce1F 2.81(3) 31 ? 
S1 Ce1A 2.916(5) 32 ? 
S1 Ce1A 2.916(5) 31 ? 
S2 Fe2 2.567(3) 25 ? 
S2 Ce1A 2.630(5) 15_554 ? 
S2 Fe1 2.641(3) 25 ? 
S2 Ce1B 2.824(12) 15_554 ? 
S2 Ce2 2.8764(9) 15_554 ? 
S2 Ce2 2.8764(9) 14_654 ? 
S2 Ce1A 2.894(8) 27 ? 
S2 Ce1C 2.989(11) 15_554 ? 
S2 Ce1B 3.263(15) 27 ? 
S2 S1 3.430(4) 15_554 ? 
S2 S1 3.430(4) 14_654 ? 
S2 Ce1C 3.448(12) 27 ? 
S2 S3 3.526(3) 2_655 ? 
S2 S3 3.526(3) 3_665 ? 
S3 Fe1 2.466(3) 25 ? 
S3 Ce2 2.848(2) 31_655 ? 
S3 Ce3 2.8948(11) 3_665 ? 
S3 Ce3 2.8948(11) 2_655 ? 
S3 Ce2 2.912(2) 13_544 ? 
S3 S4 3.501(4) 15_654 ? 
S3 S4 3.501(4) 33_545 ? 
S3 S2 3.526(3) 3_665 ? 
S3 S2 3.526(3) 2_655 ? 
S3 I1 3.623(2) 7 ? 
S3 S3 3.720(4) 2_655 ? 
S3 S3 3.720(4) 3_665 ? 
S3 S5 3.830(3) 7 ? 
S3 S5 3.830(3) 26 ? 
S4 Ce1E 2.69(3) 20_556 ? 
S4 Ce1E 2.69(3) 3 ? 
S4 Ce1F 2.70(2) 20_556 ? 
S4 Ce1F 2.70(2) 3 ? 
S4 Ce1C 2.835(8) 3 ? 
S4 Ce1C 2.835(8) 20_556 ? 
S4 Ce3 2.9139(7) 7_445 ? 
S4 Ce3 2.9139(7) 33_545 ? 
S4 Ce1D 2.96(5) 20_556 ? 
S4 Ce1D 2.96(5) 3 ? 
S4 Ce1B 2.971(12) 20_556 ? 
S4 Ce1B 2.971(12) 3 ? 
S4 Ce1G 3.150(10) 20_556 ? 
S4 Ce1G 3.150(10) 3 ? 
S5 Ce2 2.9192(7) 25 ? 
S5 Ce2 2.9192(7) 15_554 ? 
S5 Ce3 2.9443(14) 15_554 ? 
S5 Ce3 2.9443(14) 25 ? 
S5 Ce1A 3.091(5) 25 ? 
S5 Ce1A 3.091(5) 13_544 ? 
S5 S1 3.347(3) 25 ? 
S5 S1 3.347(3) 15_554 ? 
S5 Ce1B 3.350(12) 25 ? 
S5 Ce1B 3.350(12) 13_544 ? 
S5 Ce1C 3.510(10) 25 ? 
S5 Ce1C 3.510(10) 13_544 ? 
S5 S2 3.763(3) 2_655 ? 
S5 S2 3.763(3) 20 ? 
I1 S3 3.622(2) 27_445 ? 
I1 S3 3.622(2) 15_554 ? 
I1 S3 3.622(2) 26_455 ? 
I1 S3 3.622(2) 14_544 ? 
I1 S3 3.623(2) 25 ? 
I1 S3 3.623(2) 13_444 ? 
I1 Ce3 3.7497(9) 13_444 ? 
I1 Ce3 3.7497(9) 25 ? 
I1 Ce3 3.7497(9) 14_544 ? 
I1 Ce3 3.7497(9) 26_455 ? 
I1 Ce3 3.7497(9) 27_445 ? 
I1 Ce3 3.7497(9) 15_554 ? 
 
loop_ 
 _geom_angle_atom_site_label_1 
 _geom_angle_atom_site_label_2 
 _geom_angle_atom_site_label_3 
 _geom_angle 
 _geom_angle_site_symmetry_1 
 _geom_angle_site_symmetry_3 
 _geom_angle_publ_flag 
S2 Ce1A S2 127.3(4) 8 26_455 ? 
S2 Ce1A S1 139.77(12) 8 31 ? 
S2 Ce1A S1 72.36(13) 26_455 31 ? 
S2 Ce1A S1 139.77(12) 8 33_545 ? 
S2 Ce1A S1 72.36(12) 26_455 33_545 ? 
S1 Ce1A S1 75.78(18) 31 33_545 ? 
S2 Ce1A S5 81.84(13) 8 25 ? 
S2 Ce1A S5 77.84(17) 26_455 25 ? 
S1 Ce1A S5 138.25(13) 31 25 ? 
S1 Ce1A S5 67.64(8) 33_545 25 ? 
S2 Ce1A S5 81.84(13) 8 7_455 ? 
S2 Ce1A S5 77.84(17) 26_455 7_455 ? 
S1 Ce1A S5 67.64(8) 31 7_455 ? 
S1 Ce1A S5 138.25(13) 33_545 7_455 ? 
S5 Ce1A S5 133.0(4) 25 7_455 ? 
S2 Ce1A S4 77.44(15) 8 21_556 ? 
S2 Ce1A S4 137.53(8) 26_455 21_556 ? 
S1 Ce1A S4 112.9(3) 31 21_556 ? 
S1 Ce1A S4 68.82(17) 33_545 21_556 ? 
S5 Ce1A S4 72.10(7) 25 21_556 ? 
S5 Ce1A S4 144.4(2) 7_455 21_556 ? 
S2 Ce1A S4 77.43(15) 8 2 ? 
S2 Ce1A S4 137.53(8) 26_455 2 ? 
S1 Ce1A S4 68.82(17) 31 2 ? 
S1 Ce1A S4 112.9(3) 33_545 2 ? 
S5 Ce1A S4 144.4(2) 25 2 ? 
S5 Ce1A S4 72.10(7) 7_455 2 ? 
S4 Ce1A S4 75.3(2) 21_556 2 ? 
S2 Ce1A Fe2 173.2(4) 8 . ? 
S2 Ce1A Fe2 45.89(9) 26_455 . ? 
S1 Ce1A Fe2 42.77(8) 31 . ? 
S1 Ce1A Fe2 42.77(8) 33_545 . ? 
S5 Ce1A Fe2 95.53(9) 25 . ? 
S5 Ce1A Fe2 95.53(9) 7_455 . ? 
S4 Ce1A Fe2 107.9(2) 21_556 . ? 
S4 Ce1A Fe2 107.9(2) 2 . ? 
S2 Ce1A Ce2 42.38(4) 8 . ? 
S2 Ce1A Ce2 116.9(2) 26_455 . ? 
S1 Ce1A Ce2 167.5(3) 31 . ? 
S1 Ce1A Ce2 98.54(7) 33_545 . ? 
S5 Ce1A Ce2 43.92(4) 25 . ? 
S5 Ce1A Ce2 121.06(18) 7_455 . ? 
S4 Ce1A Ce2 54.70(8) 21_556 . ? 
S4 Ce1A Ce2 104.22(13) 2 . ? 
Fe2 Ce1A Ce2 137.24(4) . . ? 
S2 Ce1A Ce2 42.38(4) 8 3_565 ? 
S2 Ce1A Ce2 116.9(2) 26_455 3_565 ? 
S1 Ce1A Ce2 98.54(7) 31 3_565 ? 
S1 Ce1A Ce2 167.5(3) 33_545 3_565 ? 
S5 Ce1A Ce2 121.06(18) 25 3_565 ? 
S5 Ce1A Ce2 43.92(4) 7_455 3_565 ? 
S4 Ce1A Ce2 104.22(13) 21_556 3_565 ? 
S4 Ce1A Ce2 54.70(8) 2 3_565 ? 
Fe2 Ce1A Ce2 137.24(4) . 3_565 ? 
Ce2 Ce1A Ce2 84.76(8) . 3_565 ? 
S2 Ce1A Ce2 121.3(2) 8 31 ? 
S2 Ce1A Ce2 41.71(6) 26_455 31 ? 
S1 Ce1A Ce2 46.12(11) 31 31 ? 
S1 Ce1A Ce2 96.75(11) 33_545 31 ? 
S5 Ce1A Ce2 118.5(2) 25 31 ? 
S5 Ce1A Ce2 42.78(6) 7_455 31 ? 
S4 Ce1A Ce2 158.4(2) 21_556 31 ? 
S4 Ce1A Ce2 97.08(4) 2 31 ? 
Fe2 Ce1A Ce2 54.54(6) . 31 ? 
Ce2 Ce1A Ce2 146.3(3) . 31 ? 
Ce2 Ce1A Ce2 86.70(8) 3_565 31 ? 
S2 Ce1A Ce2 121.3(2) 8 33_545 ? 
S2 Ce1A Ce2 41.71(6) 26_455 33_545 ? 
S1 Ce1A Ce2 96.75(11) 31 33_545 ? 
S1 Ce1A Ce2 46.12(11) 33_545 33_545 ? 
S5 Ce1A Ce2 42.78(6) 25 33_545 ? 
S5 Ce1A Ce2 118.5(2) 7_455 33_545 ? 
S4 Ce1A Ce2 97.08(4) 21_556 33_545 ? 
S4 Ce1A Ce2 158.4(2) 2 33_545 ? 
Fe2 Ce1A Ce2 54.54(6) . 33_545 ? 
Ce2 Ce1A Ce2 86.70(8) . 33_545 ? 
Ce2 Ce1A Ce2 146.3(3) 3_565 33_545 ? 
Ce2 Ce1A Ce2 82.60(12) 31 33_545 ? 
S1 Ce1B S1 81.4(3) 31 33_545 ? 
S1 Ce1B S2 138.4(3) 31 8 ? 
S1 Ce1B S2 138.4(3) 33_545 8 ? 
S1 Ce1B S4 130.8(8) 31 21_556 ? 
S1 Ce1B S4 76.4(3) 33_545 21_556 ? 
S2 Ce1B S4 80.85(10) 8 21_556 ? 
S1 Ce1B S4 76.4(3) 31 2 ? 
S1 Ce1B S4 130.8(8) 33_545 2 ? 
S2 Ce1B S4 80.85(10) 8 2 ? 
S4 Ce1B S4 86.1(4) 21_556 2 ? 
S1 Ce1B S2 68.98(19) 31 26_455 ? 
S1 Ce1B S2 68.98(19) 33_545 26_455 ? 
S2 Ce1B S2 108.6(7) 8 26_455 ? 
S4 Ce1B S2 136.63(13) 21_556 26_455 ? 
S4 Ce1B S2 136.63(13) 2 26_455 ? 
S1 Ce1B S5 133.8(3) 31 25 ? 
S1 Ce1B S5 65.72(14) 33_545 25 ? 
S2 Ce1B S5 74.6(3) 8 25 ? 
S4 Ce1B S5 73.11(6) 21_556 25 ? 
S4 Ce1B S5 149.82(9) 2 25 ? 
S2 Ce1B S5 69.4(3) 26_455 25 ? 
S1 Ce1B S5 65.72(14) 31 7_455 ? 
S1 Ce1B S5 133.8(3) 33_545 7_455 ? 
S2 Ce1B S5 74.6(3) 8 7_455 ? 
S4 Ce1B S5 149.82(9) 21_556 7_455 ? 
S4 Ce1B S5 73.11(6) 2 7_455 ? 
S2 Ce1B S5 69.4(3) 26_455 7_455 ? 
S5 Ce1B S5 115.6(6) 25 7_455 ? 
S1 Ce1B Fe2 43.59(8) 31 . ? 
S1 Ce1B Fe2 43.59(8) 33_545 . ? 
S2 Ce1B Fe2 153.2(7) 8 . ? 
S4 Ce1B Fe2 117.6(4) 21_556 . ? 
S4 Ce1B Fe2 117.6(4) 2 . ? 
S2 Ce1B Fe2 44.56(10) 26_455 . ? 
S5 Ce1B Fe2 91.67(18) 25 . ? 
S5 Ce1B Fe2 91.67(18) 7_455 . ? 
S1 Ce1B Ce3 116.8(5) 31 8 ? 
S1 Ce1B Ce3 116.8(5) 33_545 8 ? 
S2 Ce1B Ce3 63.05(15) 8 8 ? 
S4 Ce1B Ce3 44.92(16) 21_556 8 ? 
S4 Ce1B Ce3 44.92(16) 2 8 ? 
S2 Ce1B Ce3 171.7(5) 26_455 8 ? 
S5 Ce1B Ce3 106.91(6) 25 8 ? 
S5 Ce1B Ce3 106.91(6) 7_455 8 ? 
Fe2 Ce1B Ce3 143.8(6) . 8 ? 
S1 Ce1B Ce3 42.91(8) 31 31 ? 
S1 Ce1B Ce3 123.1(3) 33_545 31 ? 
S2 Ce1B Ce3 98.42(10) 8 31 ? 
S4 Ce1B Ce3 126.9(5) 21_556 31 ? 
S4 Ce1B Ce3 42.43(4) 2 31 ? 
S2 Ce1B Ce3 94.34(14) 26_455 31 ? 
S5 Ce1B Ce3 158.2(6) 25 31 ? 
S5 Ce1B Ce3 42.99(4) 7_455 31 ? 
Fe2 Ce1B Ce3 85.85(9) . 31 ? 
Ce3 Ce1B Ce3 87.2(2) 8 31 ? 
S1 Ce1B Ce3 123.1(3) 31 33_545 ? 
S1 Ce1B Ce3 42.90(8) 33_545 33_545 ? 
S2 Ce1B Ce3 98.42(10) 8 33_545 ? 
S4 Ce1B Ce3 42.43(4) 21_556 33_545 ? 
S4 Ce1B Ce3 126.9(5) 2 33_545 ? 
S2 Ce1B Ce3 94.34(14) 26_455 33_545 ? 
S5 Ce1B Ce3 42.99(4) 25 33_545 ? 
S5 Ce1B Ce3 158.2(6) 7_455 33_545 ? 
Fe2 Ce1B Ce3 85.85(9) . 33_545 ? 
Ce3 Ce1B Ce3 87.2(2) 8 33_545 ? 
Ce3 Ce1B Ce3 157.5(5) 31 33_545 ? 
S1 Ce1B Ce2 174.3(7) 31 . ? 
S1 Ce1B Ce2 98.27(11) 33_545 . ? 
S2 Ce1B Ce2 40.81(9) 8 . ? 
S4 Ce1B Ce2 54.16(11) 21_556 . ? 
S4 Ce1B Ce2 107.78(8) 2 . ? 
S2 Ce1B Ce2 105.5(4) 26_455 . ? 
S5 Ce1B Ce2 42.17(10) 25 . ? 
S5 Ce1B Ce2 111.3(4) 7_455 . ? 
Fe2 Ce1B Ce2 133.5(2) . . ? 
Ce3 Ce1B Ce2 68.43(4) 8 . ? 
Ce3 Ce1B Ce2 138.38(14) 31 . ? 
Ce3 Ce1B Ce2 57.79(3) 33_545 . ? 
S1 Ce1C S1 84.0(2) 31 33_545 ? 
S1 Ce1C S4 141.4(7) 31 21_556 ? 
S1 Ce1C S4 79.9(2) 33_545 21_556 ? 
S1 Ce1C S4 79.9(2) 31 2 ? 
S1 Ce1C S4 141.4(7) 33_545 2 ? 
S4 Ce1C S4 91.3(3) 21_556 2 ? 
S1 Ce1C S2 133.6(3) 31 8 ? 
S1 Ce1C S2 133.6(3) 33_545 8 ? 
S4 Ce1C S2 80.37(12) 21_556 8 ? 
S4 Ce1C S2 80.37(13) 2 8 ? 
S1 Ce1C S2 66.75(18) 31 26_455 ? 
S1 Ce1C S2 66.75(18) 33_545 26_455 ? 
S4 Ce1C S2 134.24(19) 21_556 26_455 ? 
S4 Ce1C S2 134.24(19) 2 26_455 ? 
S2 Ce1C S2 100.3(5) 8 26_455 ? 
S1 Ce1C Fe2 43.96(8) 31 . ? 
S1 Ce1C Fe2 43.96(8) 33_545 . ? 
S4 Ce1C Fe2 122.4(3) 21_556 . ? 
S4 Ce1C Fe2 122.4(3) 2 . ? 
S2 Ce1C Fe2 143.9(5) 8 . ? 
S2 Ce1C Fe2 43.58(10) 26_455 . ? 
S1 Ce1C S5 129.8(3) 31 25 ? 
S1 Ce1C S5 63.84(15) 33_545 25 ? 
S4 Ce1C S5 72.18(10) 21_556 25 ? 
S4 Ce1C S5 148.1(2) 2 25 ? 
S2 Ce1C S5 70.2(3) 8 25 ? 
S2 Ce1C S5 65.5(2) 26_455 25 ? 
Fe2 Ce1C S5 89.32(16) . 25 ? 
S1 Ce1C S5 63.84(15) 31 7_455 ? 
S1 Ce1C S5 129.8(3) 33_545 7_455 ? 
S4 Ce1C S5 148.1(2) 21_556 7_455 ? 
S4 Ce1C S5 72.17(10) 2 7_455 ? 
S2 Ce1C S5 70.2(3) 8 7_455 ? 
S2 Ce1C S5 65.5(2) 26_455 7_455 ? 
Fe2 Ce1C S5 89.32(16) . 7_455 ? 
S5 Ce1C S5 107.7(4) 25 7_455 ? 
S1 Ce1C Ce3 123.3(4) 31 8 ? 
S1 Ce1C Ce3 123.3(4) 33_545 8 ? 
S4 Ce1C Ce3 46.87(11) 21_556 8 ? 
S4 Ce1C Ce3 46.87(11) 2 8 ? 
S2 Ce1C Ce3 64.11(9) 8 8 ? 
S2 Ce1C Ce3 164.4(4) 26_455 8 ? 
Fe2 Ce1C Ce3 152.0(5) . 8 ? 
S5 Ce1C Ce3 106.69(7) 25 8 ? 
S5 Ce1C Ce3 106.69(7) 7_455 8 ? 
S1 Ce1C Ce3 43.43(7) 31 31 ? 
S1 Ce1C Ce3 126.9(2) 33_545 31 ? 
S4 Ce1C Ce3 133.2(4) 21_556 31 ? 
S4 Ce1C Ce3 42.85(2) 2 31 ? 
S2 Ce1C Ce3 96.73(13) 8 31 ? 
S2 Ce1C Ce3 92.46(12) 26_455 31 ? 
Fe2 Ce1C Ce3 86.77(6) . 31 ? 
S5 Ce1C Ce3 150.6(4) 25 31 ? 
S5 Ce1C Ce3 43.17(3) 7_455 31 ? 
Ce3 Ce1C Ce3 89.58(13) 8 31 ? 
S1 Ce1C Ce3 126.9(2) 31 33_545 ? 
S1 Ce1C Ce3 43.43(7) 33_545 33_545 ? 
S4 Ce1C Ce3 42.85(2) 21_556 33_545 ? 
S4 Ce1C Ce3 133.2(4) 2 33_545 ? 
S2 Ce1C Ce3 96.73(13) 8 33_545 ? 
S2 Ce1C Ce3 92.46(12) 26_455 33_545 ? 
Fe2 Ce1C Ce3 86.77(6) . 33_545 ? 
S5 Ce1C Ce3 43.17(3) 25 33_545 ? 
S5 Ce1C Ce3 150.6(4) 7_455 33_545 ? 
Ce3 Ce1C Ce3 89.58(13) 8 33_545 ? 
Ce3 Ce1C Ce3 164.6(4) 31 33_545 ? 
S1 Ce1C Ce2 165.3(5) 31 . ? 
S1 Ce1C Ce2 96.68(14) 33_545 . ? 
S4 Ce1C Ce2 52.60(14) 21_556 . ? 
S4 Ce1C Ce2 107.55(11) 2 . ? 
S2 Ce1C Ce2 39.53(8) 8 . ? 
S2 Ce1C Ce2 99.9(3) 26_455 . ? 
Fe2 Ce1C Ce2 130.1(2) . . ? 
S5 Ce1C Ce2 40.80(9) 25 . ? 
S5 Ce1C Ce2 105.6(3) 7_455 . ? 
Ce3 Ce1C Ce2 68.38(5) 8 . ? 
Ce3 Ce1C Ce2 135.88(19) 31 . ? 
Ce3 Ce1C Ce2 57.20(5) 33_545 . ? 
S1 Ce1D S1 101(2) 31 33_545 ? 
S1 Ce1D S4 159.8(16) 31 21_556 ? 
S1 Ce1D S4 83.2(5) 33_545 21_556 ? 
S1 Ce1D S4 83.2(5) 31 2 ? 
S1 Ce1D S4 159.8(16) 33_545 2 ? 
S4 Ce1D S4 86.6(17) 21_556 2 ? 
S1 Ce1D Fe2 50.6(11) 31 . ? 
S1 Ce1D Fe2 50.6(11) 33_545 . ? 
S4 Ce1D Fe2 132.5(7) 21_556 . ? 
S4 Ce1D Fe2 132.5(7) 2 . ? 
S1 Ce1D S1 126.0(7) 31 8 ? 
S1 Ce1D S1 126.0(6) 33_545 8 ? 
S4 Ce1D S1 62.6(9) 21_556 8 ? 
S4 Ce1D S1 62.6(9) 2 8 ? 
Fe2 Ce1D S1 151.1(14) . 8 ? 
S1 Ce1D S1 62.2(14) 31 32_445 ? 
S1 Ce1D S1 62.2(14) 33_545 32_445 ? 
S4 Ce1D S1 134.6(8) 21_556 32_445 ? 
S4 Ce1D S1 134.6(8) 2 32_445 ? 
Fe2 Ce1D S1 36.9(7) . 32_445 ? 
S1 Ce1D S1 114.2(8) 8 32_445 ? 
S1 Ce1D S2 57.7(8) 31 26_455 ? 
S1 Ce1D S2 57.7(8) 33_545 26_455 ? 
S4 Ce1D S2 110.6(6) 21_556 26_455 ? 
S4 Ce1D S2 110.6(6) 2 26_455 ? 
Fe2 Ce1D S2 39.3(4) . 26_455 ? 
S1 Ce1D S2 169.6(16) 8 26_455 ? 
S1 Ce1D S2 76.2(10) 32_445 26_455 ? 
S1 Ce1D Ce3 126.7(13) 31 8 ? 
S1 Ce1D Ce3 126.7(13) 33_545 8 ? 
S4 Ce1D Ce3 43.8(8) 21_556 8 ? 
S4 Ce1D Ce3 43.8(8) 2 8 ? 
Fe2 Ce1D Ce3 165.7(10) . 8 ? 
S1 Ce1D Ce3 43.3(6) 8 8 ? 
S1 Ce1D Ce3 157.5(7) 32_445 8 ? 
S2 Ce1D Ce3 126.4(10) 26_455 8 ? 
S1 Ce1E S1 88.9(15) 31 33_545 ? 
S1 Ce1E S4 164.2(13) 31 21_556 ? 
S1 Ce1E S4 84.72(18) 33_545 21_556 ? 
S1 Ce1E S4 84.72(18) 31 2 ? 
S1 Ce1E S4 164.2(13) 33_545 2 ? 
S4 Ce1E S4 97.6(16) 21_556 2 ? 
S1 Ce1E Fe2 44.5(7) 31 . ? 
S1 Ce1E Fe2 44.5(7) 33_545 . ? 
S4 Ce1E Fe2 128.4(8) 21_556 . ? 
S4 Ce1E Fe2 128.4(7) 2 . ? 
S1 Ce1E S1 126.7(7) 31 8 ? 
S1 Ce1E S1 126.7(7) 33_545 8 ? 
S4 Ce1E S1 68.1(8) 21_556 8 ? 
S4 Ce1E S1 68.1(8) 2 8 ? 
Fe2 Ce1E S1 144.0(12) . 8 ? 
S1 Ce1E Ce3 133.8(9) 31 8 ? 
S1 Ce1E Ce3 133.8(8) 33_545 8 ? 
S4 Ce1E Ce3 49.3(8) 21_556 8 ? 
S4 Ce1E Ce3 49.3(8) 2 8 ? 
Fe2 Ce1E Ce3 168.8(10) . 8 ? 
S1 Ce1E Ce3 47.3(6) 8 8 ? 
S1 Ce1E S2 102.7(8) 31 8 ? 
S1 Ce1E S2 102.7(8) 33_545 8 ? 
S4 Ce1E S2 64.8(8) 21_556 8 ? 
S4 Ce1E S2 64.8(8) 2 8 ? 
Fe2 Ce1E S2 110.9(8) . 8 ? 
S1 Ce1E S2 105.2(12) 8 8 ? 
Ce3 Ce1E S2 57.9(7) 8 8 ? 
S1 Ce1E S2 53.9(7) 31 26_455 ? 
S1 Ce1E S2 53.9(7) 33_545 26_455 ? 
S4 Ce1E S2 111.3(7) 21_556 26_455 ? 
S4 Ce1E S2 111.3(7) 2 26_455 ? 
Fe2 Ce1E S2 37.2(4) . 26_455 ? 
S1 Ce1E S2 178.8(13) 8 26_455 ? 
Ce3 Ce1E S2 131.6(9) 8 26_455 ? 
S2 Ce1E S2 73.6(5) 8 26_455 ? 
S1 Ce1E Ce3 42.61(17) 31 31 ? 
S1 Ce1E Ce3 130.2(13) 33_545 31 ? 
S4 Ce1E Ce3 137.9(14) 21_556 31 ? 
S4 Ce1E Ce3 42.13(14) 2 31 ? 
Fe2 Ce1E Ce3 86.8(6) . 31 ? 
S1 Ce1E Ce3 97.9(5) 8 31 ? 
Ce3 Ce1E Ce3 91.4(7) 8 31 ? 
S2 Ce1E Ce3 82.8(5) 8 31 ? 
S2 Ce1E Ce3 82.0(5) 26_455 31 ? 
S4 Ce1F S4 97.2(10) 21_556 2 ? 
S4 Ce1F S1 141.4(19) 21_556 31 ? 
S4 Ce1F S1 79.9(6) 2 31 ? 
S4 Ce1F S1 79.9(6) 21_556 33_545 ? 
S4 Ce1F S1 141.4(19) 2 33_545 ? 
S1 Ce1F S1 79.2(10) 31 33_545 ? 
S4 Ce1F S1 76.2(8) 21_556 8 ? 
S4 Ce1F S1 76.2(8) 2 8 ? 
S1 Ce1F S1 138.0(9) 31 8 ? 
S1 Ce1F S1 138.0(9) 33_545 8 ? 
S4 Ce1F Ce3 51.0(5) 21_556 8 ? 
S4 Ce1F Ce3 51.0(5) 2 8 ? 
S1 Ce1F Ce3 128.8(9) 31 8 ? 
S1 Ce1F Ce3 128.8(9) 33_545 8 ? 
S1 Ce1F Ce3 50.8(5) 8 8 ? 
S4 Ce1F Fe2 117.7(11) 21_556 . ? 
S4 Ce1F Fe2 117.7(11) 2 . ? 
S1 Ce1F Fe2 40.3(5) 31 . ? 
S1 Ce1F Fe2 40.3(5) 33_545 . ? 
S1 Ce1F Fe2 156.5(14) 8 . ? 
Ce3 Ce1F Fe2 152.7(15) 8 . ? 
S4 Ce1F S1 130.3(5) 21_556 32_445 ? 
S4 Ce1F S1 130.3(5) 2 32_445 ? 
S1 Ce1F S1 54.9(5) 31 32_445 ? 
S1 Ce1F S1 54.9(5) 33_545 32_445 ? 
S1 Ce1F S1 122.9(13) 8 32_445 ? 
Ce3 Ce1F S1 173.7(14) 8 32_445 ? 
Fe2 Ce1F S1 33.6(3) . 32_445 ? 
S4 Ce1F S2 58.1(8) 21_556 8 ? 
S4 Ce1F S2 58.1(8) 2 8 ? 
S1 Ce1F S2 89.6(11) 31 8 ? 
S1 Ce1F S2 89.6(11) 33_545 8 ? 
S1 Ce1F S2 105.8(8) 8 8 ? 
Ce3 Ce1F S2 55.0(5) 8 8 ? 
Fe2 Ce1F S2 97.7(11) . 8 ? 
S1 Ce1F S2 131.3(11) 32_445 8 ? 
S1 Ce1G S1 139.5(2) 8 31 ? 
S1 Ce1G S1 139.5(2) 8 33_545 ? 
S1 Ce1G S1 73.3(2) 31 33_545 ? 
S1 Ce1G S4 72.8(2) 8 21_556 ? 
S1 Ce1G S4 115.4(4) 31 21_556 ? 
S1 Ce1G S4 70.21(17) 33_545 21_556 ? 
S1 Ce1G S4 72.8(2) 8 2 ? 
S1 Ce1G S4 70.21(17) 31 2 ? 
S1 Ce1G S4 115.4(4) 33_545 2 ? 
S4 Ce1G S4 80.1(3) 21_556 2 ? 
S1 Ce1G Fe2 176.6(4) 8 . ? 
S1 Ce1G Fe2 39.24(13) 31 . ? 
S1 Ce1G Fe2 39.24(13) 33_545 . ? 
S4 Ce1G Fe2 104.7(2) 21_556 . ? 
S4 Ce1G Fe2 104.7(2) 2 . ? 
S1 Ce1G S1 63.2(2) 8 7_445 ? 
S1 Ce1G S1 144.7(4) 31 7_445 ? 
S1 Ce1G S1 104.95(18) 33_545 7_445 ? 
S4 Ce1G S1 95.85(14) 21_556 7_445 ? 
S4 Ce1G S1 134.7(3) 2 7_445 ? 
Fe2 Ce1G S1 119.7(3) . 7_445 ? 
S1 Ce1G S1 63.2(2) 8 9_455 ? 
S1 Ce1G S1 104.95(18) 31 9_455 ? 
S1 Ce1G S1 144.7(4) 33_545 9_455 ? 
S4 Ce1G S1 134.7(3) 21_556 9_455 ? 
S4 Ce1G S1 95.85(14) 2 9_455 ? 
Fe2 Ce1G S1 119.7(3) . 9_455 ? 
S1 Ce1G S1 55.76(17) 7_445 9_455 ? 
S1 Ce1G S1 147.4(4) 8 32_445 ? 
S1 Ce1G S1 59.78(18) 31 32_445 ? 
S1 Ce1G S1 59.77(18) 33_545 32_445 ? 
S4 Ce1G S1 129.04(19) 21_556 32_445 ? 
S4 Ce1G S1 129.05(19) 2 32_445 ? 
Fe2 Ce1G S1 35.99(10) . 32_445 ? 
S1 Ce1G S1 88.3(2) 7_445 32_445 ? 
S1 Ce1G S1 88.3(2) 9_455 32_445 ? 
S1 Ce1H S1 180.00(9) 31 7_445 ? 
S1 Ce1H S1 66.71(9) 31 32_445 ? 
S1 Ce1H S1 113.29(9) 7_445 32_445 ? 
S1 Ce1H S1 113.29(9) 31 8 ? 
S1 Ce1H S1 66.71(9) 7_445 8 ? 
S1 Ce1H S1 180.0 32_445 8 ? 
S1 Ce1H S1 113.29(9) 31 9_455 ? 
S1 Ce1H S1 66.71(9) 7_445 9_455 ? 
S1 Ce1H S1 113.29(9) 32_445 9_455 ? 
S1 Ce1H S1 66.71(9) 8 9_455 ? 
S1 Ce1H S1 66.71(9) 31 33_545 ? 
S1 Ce1H S1 113.29(9) 7_445 33_545 ? 
S1 Ce1H S1 66.71(9) 32_445 33_545 ? 
S1 Ce1H S1 113.29(9) 8 33_545 ? 
S1 Ce1H S1 180.0 9_455 33_545 ? 
S1 Ce1H Fe2 140.59(6) 31 19_556 ? 
S1 Ce1H Fe2 39.41(6) 7_445 19_556 ? 
S1 Ce1H Fe2 140.59(6) 32_445 19_556 ? 
S1 Ce1H Fe2 39.41(6) 8 19_556 ? 
S1 Ce1H Fe2 39.41(6) 9_455 19_556 ? 
S1 Ce1H Fe2 140.59(6) 33_545 19_556 ? 
S1 Ce1H Fe2 39.41(6) 31 . ? 
S1 Ce1H Fe2 140.59(6) 7_445 . ? 
S1 Ce1H Fe2 39.41(6) 32_445 . ? 
S1 Ce1H Fe2 140.59(6) 8 . ? 
S1 Ce1H Fe2 140.59(6) 9_455 . ? 
S1 Ce1H Fe2 39.41(6) 33_545 . ? 
Fe2 Ce1H Fe2 180.0 19_556 . ? 
S1 Ce1H S4 90.0 31 21_556 ? 
S1 Ce1H S4 90.0 7_445 21_556 ? 
S1 Ce1H S4 123.36(5) 32_445 21_556 ? 
S1 Ce1H S4 56.64(5) 8 21_556 ? 
S1 Ce1H S4 123.36(5) 9_455 21_556 ? 
S1 Ce1H S4 56.64(5) 33_545 21_556 ? 
Fe2 Ce1H S4 90.000(1) 19_556 21_556 ? 
Fe2 Ce1H S4 90.000(1) . 21_556 ? 
S1 Ce1H S4 90.0 31 3 ? 
S1 Ce1H S4 90.0 7_445 3 ? 
S1 Ce1H S4 56.64(5) 32_445 3 ? 
S1 Ce1H S4 123.36(5) 8 3 ? 
S1 Ce1H S4 56.64(5) 9_455 3 ? 
S1 Ce1H S4 123.36(5) 33_545 3 ? 
Fe2 Ce1H S4 90.000(1) 19_556 3 ? 
Fe2 Ce1H S4 90.000(1) . 3 ? 
S4 Ce1H S4 180.00(10) 21_556 3 ? 
S1 Ce1H S4 123.36(5) 31 . ? 
S1 Ce1H S4 56.64(5) 7_445 . ? 
S1 Ce1H S4 90.0 32_445 . ? 
S1 Ce1H S4 90.0 8 . ? 
S1 Ce1H S4 123.36(5) 9_455 . ? 
S1 Ce1H S4 56.64(5) 33_545 . ? 
Fe2 Ce1H S4 90.0 19_556 . ? 
Fe2 Ce1H S4 90.0 . . ? 
S4 Ce1H S4 60.0 21_556 . ? 
S4 Ce1H S4 120.0 3 . ? 
S1 Ce1H S4 56.64(5) 31 2 ? 
S1 Ce1H S4 123.36(5) 7_445 2 ? 
S1 Ce1H S4 123.36(5) 32_445 2 ? 
S1 Ce1H S4 56.64(5) 8 2 ? 
S1 Ce1H S4 90.0 9_455 2 ? 
S1 Ce1H S4 90.0 33_545 2 ? 
Fe2 Ce1H S4 90.0 19_556 2 ? 
Fe2 Ce1H S4 90.0 . 2 ? 
S4 Ce1H S4 60.0 21_556 2 ? 
S4 Ce1H S4 120.0 3 2 ? 
S4 Ce1H S4 120.000(1) . 2 ? 
S1 Ce1H S4 123.36(5) 31 20_556 ? 
S1 Ce1H S4 56.64(5) 7_445 20_556 ? 
S1 Ce1H S4 56.64(5) 32_445 20_556 ? 
S1 Ce1H S4 123.36(5) 8 20_556 ? 
S1 Ce1H S4 90.0 9_455 20_556 ? 
S1 Ce1H S4 90.0 33_545 20_556 ? 
Fe2 Ce1H S4 90.0 19_556 20_556 ? 
Fe2 Ce1H S4 90.0 . 20_556 ? 
S4 Ce1H S4 120.0 21_556 20_556 ? 
S4 Ce1H S4 60.0 3 20_556 ? 
S4 Ce1H S4 60.0 . 20_556 ? 
S4 Ce1H S4 180.0 2 20_556 ? 
S1 Ce1H S4 56.64(5) 31 19_556 ? 
S1 Ce1H S4 123.36(5) 7_445 19_556 ? 
S1 Ce1H S4 90.0 32_445 19_556 ? 
S1 Ce1H S4 90.0 8 19_556 ? 
S1 Ce1H S4 56.64(5) 9_455 19_556 ? 
S1 Ce1H S4 123.36(5) 33_545 19_556 ? 
Fe2 Ce1H S4 90.0 19_556 19_556 ? 
Fe2 Ce1H S4 90.0 . 19_556 ? 
S4 Ce1H S4 120.0 21_556 19_556 ? 
S4 Ce1H S4 60.0 3 19_556 ? 
S4 Ce1H S4 180.0 . 19_556 ? 
S4 Ce1H S4 60.0 2 19_556 ? 
S4 Ce1H S4 120.000(1) 20_556 19_556 ? 
S3 Ce2 S2 136.06(6) 31_655 8 ? 
S3 Ce2 S2 136.06(6) 31_655 9_565 ? 
S2 Ce2 S2 78.40(11) 8 9_565 ? 
S3 Ce2 S3 87.75(7) 31_655 7_455 ? 
S2 Ce2 S3 75.04(7) 8 7_455 ? 
S2 Ce2 S3 75.04(7) 9_565 7_455 ? 
S3 Ce2 S5 83.20(5) 31_655 25 ? 
S2 Ce2 S5 80.98(8) 8 25 ? 
S2 Ce2 S5 136.90(7) 9_565 25 ? 
S3 Ce2 S5 134.22(3) 7_455 25 ? 
S3 Ce2 S5 83.20(5) 31_655 8 ? 
S2 Ce2 S5 136.90(7) 8 8 ? 
S2 Ce2 S5 80.98(8) 9_565 8 ? 
S3 Ce2 S5 134.22(3) 7_455 8 ? 
S5 Ce2 S5 89.11(7) 25 8 ? 
S3 Ce2 S1 137.95(8) 31_655 . ? 
S2 Ce2 S1 69.96(8) 8 . ? 
S2 Ce2 S1 69.96(8) 9_565 . ? 
S3 Ce2 S1 134.29(8) 7_455 . ? 
S5 Ce2 S1 67.51(5) 25 . ? 
S5 Ce2 S1 67.51(5) 8 . ? 
S3 Ce2 S4 65.32(3) 31_655 3_665 ? 
S2 Ce2 S4 134.07(6) 8 3_665 ? 
S2 Ce2 S4 70.77(6) 9_565 3_665 ? 
S3 Ce2 S4 64.77(4) 7_455 3_665 ? 
S5 Ce2 S4 143.86(5) 25 3_665 ? 
S5 Ce2 S4 70.72(4) 8 3_665 ? 
S1 Ce2 S4 125.79(4) . 3_665 ? 
S3 Ce2 S4 65.32(3) 31_655 21_556 ? 
S2 Ce2 S4 70.77(6) 8 21_556 ? 
S2 Ce2 S4 134.07(6) 9_565 21_556 ? 
S3 Ce2 S4 64.77(4) 7_455 21_556 ? 
S5 Ce2 S4 70.72(4) 25 21_556 ? 
S5 Ce2 S4 143.86(5) 8 21_556 ? 
S1 Ce2 S4 125.79(4) . 21_556 ? 
S4 Ce2 S4 108.35(8) 3_665 21_556 ? 
S3 Ce2 Fe1 130.75(7) 31_655 31 ? 
S2 Ce2 Fe1 46.60(6) 8 31 ? 
S2 Ce2 Fe1 46.60(6) 9_565 31 ? 
S3 Ce2 Fe1 42.99(6) 7_455 31 ? 
S5 Ce2 Fe1 127.56(6) 25 31 ? 
S5 Ce2 Fe1 127.56(6) 8 31 ? 
S1 Ce2 Fe1 91.30(7) . 31 ? 
S4 Ce2 Fe1 87.81(3) 3_665 31 ? 
S4 Ce2 Fe1 87.81(3) 21_556 31 ? 
S3 Ce2 Fe2 178.88(7) 31_655 31 ? 
S2 Ce2 Fe2 44.41(6) 8 31 ? 
S2 Ce2 Fe2 44.41(6) 9_565 31 ? 
S3 Ce2 Fe2 93.36(7) 7_455 31 ? 
S5 Ce2 Fe2 96.01(5) 25 31 ? 
S5 Ce2 Fe2 96.01(5) 8 31 ? 
S1 Ce2 Fe2 40.93(7) . 31 ? 
S4 Ce2 Fe2 115.18(3) 3_665 31 ? 
S4 Ce2 Fe2 115.18(3) 21_556 31 ? 
Fe1 Ce2 Fe2 50.37(6) 31 31 ? 
S3 Ce2 Ce3 92.06(5) 31_655 . ? 
S2 Ce2 Ce3 105.10(6) 8 . ? 
S2 Ce2 Ce3 105.10(6) 9_565 . ? 
S3 Ce2 Ce3 179.82(5) 7_455 . ? 
S5 Ce2 Ce3 45.74(3) 25 . ? 
S5 Ce2 Ce3 45.74(3) 8 . ? 
S1 Ce2 Ce3 45.89(6) . . ? 
S4 Ce2 Ce3 115.15(3) 3_665 . ? 
S4 Ce2 Ce3 115.15(3) 21_556 . ? 
Fe1 Ce2 Ce3 137.19(4) 31 . ? 
Fe2 Ce2 Ce3 86.82(5) 31 . ? 
S3 Ce2 Ce2 44.49(5) 31_655 19_666 ? 
S2 Ce2 Ce2 108.23(6) 8 19_666 ? 
S2 Ce2 Ce2 108.23(6) 9_565 19_666 ? 
S3 Ce2 Ce2 43.27(5) 7_455 19_666 ? 
S5 Ce2 Ce2 114.07(3) 25 19_666 ? 
S5 Ce2 Ce2 114.07(3) 8 19_666 ? 
S1 Ce2 Ce2 177.56(6) . 19_666 ? 
S4 Ce2 Ce2 54.17(4) 3_665 19_666 ? 
S4 Ce2 Ce2 54.17(4) 21_556 19_666 ? 
Fe1 Ce2 Ce2 86.26(5) 31 19_666 ? 
Fe2 Ce2 Ce2 136.63(5) 31 19_666 ? 
Ce3 Ce2 Ce2 136.55(3) . 19_666 ? 
S3 Ce2 Ce3 43.724(19) 31_655 32 ? 
S2 Ce2 Ce3 177.31(6) 8 32 ? 
S2 Ce2 Ce3 100.41(5) 9_565 32 ? 
S3 Ce2 Ce3 102.35(4) 7_455 32 ? 
S5 Ce2 Ce3 101.44(5) 25 32 ? 
S5 Ce2 Ce3 44.76(3) 8 32 ? 
S1 Ce2 Ce3 111.99(4) . 32 ? 
S4 Ce2 Ce3 43.345(11) 3_665 32 ? 
S4 Ce2 Ce3 108.81(3) 21_556 32 ? 
Fe1 Ce2 Ce3 130.94(2) 31 32 ? 
Fe2 Ce2 Ce3 135.874(19) 31 32 ? 
Ce3 Ce2 Ce3 77.516(16) . 32 ? 
Ce2 Ce2 Ce3 69.771(14) 19_666 32 ? 
S3 Ce3 S3 79.95(9) 2_655 3_665 ? 
S3 Ce3 S4 128.36(6) 2_655 32 ? 
S3 Ce3 S4 74.13(9) 3_665 32 ? 
S3 Ce3 S4 74.13(9) 2_655 13_554 ? 
S3 Ce3 S4 128.36(6) 3_665 13_554 ? 
S4 Ce3 S4 88.18(12) 32 13_554 ? 
S3 Ce3 S5 81.96(5) 2_655 8 ? 
S3 Ce3 S5 138.94(6) 3_665 8 ? 
S4 Ce3 S5 143.09(8) 32 8 ? 
S4 Ce3 S5 80.30(4) 13_554 8 ? 
S3 Ce3 S5 138.94(6) 2_655 25 ? 
S3 Ce3 S5 81.96(5) 3_665 25 ? 
S4 Ce3 S5 80.30(4) 32 25 ? 
S4 Ce3 S5 143.09(8) 13_554 25 ? 
S5 Ce3 S5 88.16(3) 8 25 ? 
S3 Ce3 S1 139.85(5) 2_655 . ? 
S3 Ce3 S1 139.85(5) 3_665 . ? 
S4 Ce3 S1 74.09(9) 32 . ? 
S4 Ce3 S1 74.09(9) 13_554 . ? 
S5 Ce3 S1 69.04(6) 8 . ? 
S5 Ce3 S1 69.04(6) 25 . ? 
S3 Ce3 Ce1F 115.1(5) 2_655 15_554 ? 
S3 Ce3 Ce1F 115.1(5) 3_665 15_554 ? 
S4 Ce3 Ce1F 46.1(2) 32 15_554 ? 
S4 Ce3 Ce1F 46.1(2) 13_554 15_554 ? 
S5 Ce3 Ce1F 105.9(5) 8 15_554 ? 
S5 Ce3 Ce1F 105.9(5) 25 15_554 ? 
S1 Ce3 Ce1F 52.3(8) . 15_554 ? 
S3 Ce3 Fe1 41.21(5) 2_655 25 ? 
S3 Ce3 Fe1 41.21(5) 3_665 25 ? 
S4 Ce3 Fe1 95.33(7) 32 25 ? 
S4 Ce3 Fe1 95.33(7) 13_554 25 ? 
S5 Ce3 Fe1 120.45(4) 8 25 ? 
S5 Ce3 Fe1 120.45(4) 25 25 ? 
S1 Ce3 Fe1 164.99(9) . 25 ? 
Ce1F Ce3 Fe1 112.7(8) 15_554 25 ? 
S3 Ce3 I1 64.58(5) 2_655 7 ? 
S3 Ce3 I1 64.58(5) 3_665 7 ? 
S4 Ce3 I1 133.75(8) 32 7 ? 
S4 Ce3 I1 133.75(8) 13_554 7 ? 
S5 Ce3 I1 74.37(5) 8 7 ? 
S5 Ce3 I1 74.37(5) 25 7 ? 
S1 Ce3 I1 128.11(8) . 7 ? 
Ce1F Ce3 I1 179.6(8) 15_554 7 ? 
Fe1 Ce3 I1 66.90(4) 25 7 ? 
S3 Ce3 S2 61.82(5) 2_655 . ? 
S3 Ce3 S2 61.82(5) 3_665 . ? 
S4 Ce3 S2 66.60(4) 32 . ? 
S4 Ce3 S2 66.60(4) 13_554 . ? 
S5 Ce3 S2 135.769(15) 8 . ? 
S5 Ce3 S2 135.769(15) 25 . ? 
S1 Ce3 S2 124.00(9) . . ? 
Ce1F Ce3 S2 71.7(8) 15_554 . ? 
Fe1 Ce3 S2 41.00(6) 25 . ? 
I1 Ce3 S2 107.89(5) 7 . ? 
S3 Ce3 Ce1E 109.1(3) 2_655 15_554 ? 
S3 Ce3 Ce1E 109.1(3) 3_665 15_554 ? 
S4 Ce3 Ce1E 44.52(9) 32 15_554 ? 
S4 Ce3 Ce1E 44.52(9) 13_554 15_554 ? 
S5 Ce3 Ce1E 111.6(3) 8 15_554 ? 
S5 Ce3 Ce1E 111.6(3) 25 15_554 ? 
S1 Ce3 Ce1E 60.6(5) . 15_554 ? 
Fe1 Ce3 Ce1E 104.3(5) 25 15_554 ? 
I1 Ce3 Ce1E 171.2(5) 7 15_554 ? 
S2 Ce3 Ce1E 63.3(5) . 15_554 ? 
S3 Ce3 Ce1C 95.36(18) 2_655 15_554 ? 
S3 Ce3 Ce1C 95.36(18) 3_665 15_554 ? 
S4 Ce3 Ce1C 45.25(6) 32 15_554 ? 
S4 Ce3 Ce1C 45.25(6) 13_554 15_554 ? 
S5 Ce3 Ce1C 122.88(13) 8 15_554 ? 
S5 Ce3 Ce1C 122.88(13) 25 15_554 ? 
S1 Ce3 Ce1C 79.0(2) . 15_554 ? 
Fe1 Ce3 Ce1C 86.0(2) 25 15_554 ? 
I1 Ce3 Ce1C 152.9(2) 7 15_554 ? 
S2 Ce3 Ce1C 45.0(2) . 15_554 ? 
S3 Ce3 Ce2 123.03(5) 2_655 . ? 
S3 Ce3 Ce2 123.03(5) 3_665 . ? 
S4 Ce3 Ce2 108.53(4) 32 . ? 
S4 Ce3 Ce2 108.53(4) 13_554 . ? 
S5 Ce3 Ce2 45.240(13) 8 . ? 
S5 Ce3 Ce2 45.240(13) 25 . ? 
S1 Ce3 Ce2 48.70(8) . . ? 
Ce1F Ce3 Ce2 101.0(8) 15_554 . ? 
Fe1 Ce3 Ce2 146.31(4) 25 . ? 
I1 Ce3 Ce2 79.41(2) 7 . ? 
S2 Ce3 Ce2 172.70(5) . . ? 
Ce1E Ce3 Ce2 109.3(5) 15_554 . ? 
Ce1C Ce3 Ce2 127.7(2) 15_554 . ? 
S3 Fe1 S3 97.93(10) 26_455 27_445 ? 
S3 Fe1 S3 97.93(10) 26_455 25 ? 
S3 Fe1 S3 97.93(10) 27_445 25 ? 
S3 Fe1 S2 87.25(6) 26_455 25 ? 
S3 Fe1 S2 87.25(6) 27_445 25 ? 
S3 Fe1 S2 172.06(13) 25 25 ? 
S3 Fe1 S2 172.06(13) 26_455 26_455 ? 
S3 Fe1 S2 87.25(6) 27_445 26_455 ? 
S3 Fe1 S2 87.25(6) 25 26_455 ? 
S2 Fe1 S2 86.99(12) 25 26_455 ? 
S3 Fe1 S2 87.25(6) 26_455 27_445 ? 
S3 Fe1 S2 172.06(13) 27_445 27_445 ? 
S3 Fe1 S2 87.25(6) 25 27_445 ? 
S2 Fe1 S2 86.99(12) 25 27_445 ? 
S2 Fe1 S2 86.99(12) 26_455 27_445 ? 
S3 Fe1 Fe2 119.42(8) 26_455 . ? 
S3 Fe1 Fe2 119.42(8) 27_445 . ? 
S3 Fe1 Fe2 119.42(8) 25 . ? 
S2 Fe1 Fe2 52.64(8) 25 . ? 
S2 Fe1 Fe2 52.64(8) 26_455 . ? 
S2 Fe1 Fe2 52.64(8) 27_445 . ? 
S3 Fe1 Ce2 126.779(11) 26_455 31 ? 
S3 Fe1 Ce2 126.779(11) 27_445 31 ? 
S3 Fe1 Ce2 53.65(6) 25 31 ? 
S2 Fe1 Ce2 118.41(11) 25 31 ? 
S2 Fe1 Ce2 52.31(2) 26_455 31 ? 
S2 Fe1 Ce2 52.31(2) 27_445 31 ? 
Fe2 Fe1 Ce2 65.77(4) . 31 ? 
S3 Fe1 Ce2 126.780(11) 26_455 33_545 ? 
S3 Fe1 Ce2 53.65(6) 27_445 33_545 ? 
S3 Fe1 Ce2 126.780(11) 25 33_545 ? 
S2 Fe1 Ce2 52.31(2) 25 33_545 ? 
S2 Fe1 Ce2 52.31(2) 26_455 33_545 ? 
S2 Fe1 Ce2 118.41(11) 27_445 33_545 ? 
Fe2 Fe1 Ce2 65.77(4) . 33_545 ? 
Ce2 Fe1 Ce2 104.32(5) 31 33_545 ? 
S3 Fe1 Ce2 53.65(6) 26_455 32_445 ? 
S3 Fe1 Ce2 126.780(11) 27_445 32_445 ? 
S3 Fe1 Ce2 126.780(11) 25 32_445 ? 
S2 Fe1 Ce2 52.31(2) 25 32_445 ? 
S2 Fe1 Ce2 118.41(11) 26_455 32_445 ? 
S2 Fe1 Ce2 52.31(2) 27_445 32_445 ? 
Fe2 Fe1 Ce2 65.77(4) . 32_445 ? 
Ce2 Fe1 Ce2 104.32(5) 31 32_445 ? 
Ce2 Fe1 Ce2 104.32(5) 33_545 32_445 ? 
S3 Fe1 Ce3 50.67(3) 26_455 25 ? 
S3 Fe1 Ce3 50.67(3) 27_445 25 ? 
S3 Fe1 Ce3 117.23(11) 25 25 ? 
S2 Fe1 Ce3 70.71(7) 25 25 ? 
S2 Fe1 Ce3 131.726(17) 26_455 25 ? 
S2 Fe1 Ce3 131.726(17) 27_445 25 ? 
Fe2 Fe1 Ce3 123.34(4) . 25 ? 
Ce2 Fe1 Ce3 170.88(8) 31 25 ? 
Ce2 Fe1 Ce3 81.062(15) 33_545 25 ? 
Ce2 Fe1 Ce3 81.062(15) 32_445 25 ? 
S3 Fe1 Ce3 50.67(3) 26_455 27_445 ? 
S3 Fe1 Ce3 117.23(11) 27_445 27_445 ? 
S3 Fe1 Ce3 50.67(3) 25 27_445 ? 
S2 Fe1 Ce3 131.726(17) 25 27_445 ? 
S2 Fe1 Ce3 131.723(17) 26_455 27_445 ? 
S2 Fe1 Ce3 70.71(7) 27_445 27_445 ? 
Fe2 Fe1 Ce3 123.34(4) . 27_445 ? 
Ce2 Fe1 Ce3 81.062(15) 31 27_445 ? 
Ce2 Fe1 Ce3 170.88(8) 33_545 27_445 ? 
Ce2 Fe1 Ce3 81.063(15) 32_445 27_445 ? 
Ce3 Fe1 Ce3 92.68(5) 25 27_445 ? 
S3 Fe1 Ce3 117.23(11) 26_455 26_455 ? 
S3 Fe1 Ce3 50.67(3) 27_445 26_455 ? 
S3 Fe1 Ce3 50.67(3) 25 26_455 ? 
S2 Fe1 Ce3 131.726(17) 25 26_455 ? 
S2 Fe1 Ce3 70.71(7) 26_455 26_455 ? 
S2 Fe1 Ce3 131.723(17) 27_445 26_455 ? 
Fe2 Fe1 Ce3 123.34(4) . 26_455 ? 
Ce2 Fe1 Ce3 81.062(15) 31 26_455 ? 
Ce2 Fe1 Ce3 81.063(15) 33_545 26_455 ? 
Ce2 Fe1 Ce3 170.88(8) 32_445 26_455 ? 
Ce3 Fe1 Ce3 92.68(5) 25 26_455 ? 
Ce3 Fe1 Ce3 92.68(5) 27_445 26_455 ? 
S1 Fe2 S1 95.76(15) 31 33_545 ? 
S1 Fe2 S1 95.76(15) 31 32_445 ? 
S1 Fe2 S1 95.76(15) 33_545 32_445 ? 
S1 Fe2 S2 175.92(16) 31 25 ? 
S1 Fe2 S2 86.96(9) 33_545 25 ? 
S1 Fe2 S2 86.96(9) 32_445 25 ? 
S1 Fe2 S2 86.96(9) 31 27_445 ? 
S1 Fe2 S2 175.92(16) 33_545 27_445 ? 
S1 Fe2 S2 86.96(9) 32_445 27_445 ? 
S2 Fe2 S2 90.16(12) 25 27_445 ? 
S1 Fe2 S2 86.96(9) 31 26_455 ? 
S1 Fe2 S2 86.96(9) 33_545 26_455 ? 
S1 Fe2 S2 175.92(16) 32_445 26_455 ? 
S2 Fe2 S2 90.16(12) 25 26_455 ? 
S2 Fe2 S2 90.16(12) 27_445 26_455 ? 
S1 Fe2 Fe1 121.07(11) 31 . ? 
S1 Fe2 Fe1 121.07(11) 33_545 . ? 
S1 Fe2 Fe1 121.07(11) 32_445 . ? 
S2 Fe2 Fe1 54.85(9) 25 . ? 
S2 Fe2 Fe1 54.85(9) 27_445 . ? 
S2 Fe2 Fe1 54.85(9) 26_455 . ? 
S1 Fe2 Ce1D 48.13(10) 31 . ? 
S1 Fe2 Ce1D 48.13(10) 33_545 . ? 
S1 Fe2 Ce1D 93.0(6) 32_445 . ? 
S2 Fe2 Ce1D 134.91(7) 25 . ? 
S2 Fe2 Ce1D 134.91(7) 27_445 . ? 
S2 Fe2 Ce1D 91.0(6) 26_455 . ? 
Fe1 Fe2 Ce1D 145.9(6) . . ? 
S1 Fe2 Ce1D 93.0(6) 31 3 ? 
S1 Fe2 Ce1D 48.13(10) 33_545 3 ? 
S1 Fe2 Ce1D 48.13(10) 32_445 3 ? 
S2 Fe2 Ce1D 91.0(6) 25 3 ? 
S2 Fe2 Ce1D 134.91(7) 27_445 3 ? 
S2 Fe2 Ce1D 134.91(7) 26_455 3 ? 
Fe1 Fe2 Ce1D 145.9(6) . 3 ? 
S1 Fe2 Ce1D 48.13(10) 31 2 ? 
S1 Fe2 Ce1D 93.0(6) 33_545 2 ? 
S1 Fe2 Ce1D 48.13(10) 32_445 2 ? 
S2 Fe2 Ce1D 134.91(7) 25 2 ? 
S2 Fe2 Ce1D 91.0(6) 27_445 2 ? 
S2 Fe2 Ce1D 134.91(7) 26_455 2 ? 
Fe1 Fe2 Ce1D 145.9(6) . 2 ? 
S1 Fe2 Ce1E 47.96(9) 31 . ? 
S1 Fe2 Ce1E 47.97(8) 33_545 . ? 
S1 Fe2 Ce1E 95.4(6) 32_445 . ? 
S2 Fe2 Ce1E 134.91(6) 25 . ? 
S2 Fe2 Ce1E 134.91(6) 27_445 . ? 
S2 Fe2 Ce1E 88.7(6) 26_455 . ? 
Fe1 Fe2 Ce1E 143.6(6) . . ? 
S1 Fe2 Ce1E 95.4(6) 31 3 ? 
S1 Fe2 Ce1E 47.96(8) 33_545 3 ? 
S1 Fe2 Ce1E 47.96(8) 32_445 3 ? 
S2 Fe2 Ce1E 88.7(6) 25 3 ? 
S2 Fe2 Ce1E 134.91(6) 27_445 3 ? 
S2 Fe2 Ce1E 134.91(6) 26_455 3 ? 
Fe1 Fe2 Ce1E 143.6(6) . 3 ? 
S1 Fe2 Ce1E 47.96(9) 31 2 ? 
S1 Fe2 Ce1E 95.4(6) 33_545 2 ? 
S1 Fe2 Ce1E 47.97(8) 32_445 2 ? 
S2 Fe2 Ce1E 134.91(6) 25 2 ? 
S2 Fe2 Ce1E 88.7(6) 27_445 2 ? 
S2 Fe2 Ce1E 134.91(6) 26_455 2 ? 
Fe1 Fe2 Ce1E 143.6(6) . 2 ? 
S1 Fe2 Ce1C 50.28(9) 31 . ? 
S1 Fe2 Ce1C 50.28(9) 33_545 . ? 
S1 Fe2 Ce1C 116.3(3) 32_445 . ? 
S2 Fe2 Ce1C 130.90(10) 25 . ? 
S2 Fe2 Ce1C 130.90(10) 27_445 . ? 
S2 Fe2 Ce1C 67.8(3) 26_455 . ? 
Fe1 Fe2 Ce1C 122.6(3) . . ? 
Ce1D S1 Fe2 81.3(12) 32 31 ? 
Ce1D S1 Fe2 81.3(12) 31 31 ? 
Fe2 S1 Ce1E 87.5(8) 31 32 ? 
Fe2 S1 Ce1E 87.5(8) 31 31 ? 
Fe2 S1 Ce1C 85.76(10) 31 31 ? 
Fe2 S1 Ce1C 85.76(10) 31 32 ? 
Fe2 S1 Ce1B 84.74(11) 31 32 ? 
Fe2 S1 Ce1B 84.74(12) 31 31 ? 
Fe2 S1 Ce1G 100.9(3) 31 15_554 ? 
Fe2 S1 Ce1F 90.9(4) 31 32 ? 
Fe2 S1 Ce1F 90.9(4) 31 31 ? 
Fe2 S1 Ce1A 82.14(9) 31 32 ? 
Fe2 S1 Ce1A 82.14(10) 31 31 ? 
Fe2 S2 Ce1A 132.8(3) 25 15_554 ? 
Fe2 S2 Fe1 72.52(10) 25 25 ? 
Ce1A S2 Fe1 154.7(3) 15_554 25 ? 
Fe2 S2 Ce1B 143.7(4) 25 15_554 ? 
Fe1 S2 Ce1B 143.8(4) 25 15_554 ? 
Fe2 S2 Ce2 83.95(6) 25 15_554 ? 
Ce1A S2 Ce2 99.58(6) 15_554 15_554 ? 
Fe1 S2 Ce2 81.10(6) 25 15_554 ? 
Ce1B S2 Ce2 99.29(6) 15_554 15_554 ? 
Fe2 S2 Ce2 83.95(6) 25 14_654 ? 
Ce1A S2 Ce2 99.58(6) 15_554 14_654 ? 
Fe1 S2 Ce2 81.10(6) 25 14_654 ? 
Ce1B S2 Ce2 99.29(6) 15_554 14_654 ? 
Ce2 S2 Ce2 160.81(11) 15_554 14_654 ? 
Fe2 S2 Ce1A 80.07(19) 25 27 ? 
Fe1 S2 Ce1A 152.6(2) 25 27 ? 
Ce2 S2 Ce1A 96.26(7) 15_554 27 ? 
Ce2 S2 Ce1A 96.26(7) 14_654 27 ? 
Fe2 S2 Ce1C 148.3(3) 25 15_554 ? 
Fe1 S2 Ce1C 139.1(3) 25 15_554 ? 
Ce2 S2 Ce1C 99.06(6) 15_554 15_554 ? 
Ce2 S2 Ce1C 99.06(6) 14_654 15_554 ? 
Fe2 S2 Ce1B 72.4(3) 25 27 ? 
Fe1 S2 Ce1B 144.9(3) 25 27 ? 
Ce2 S2 Ce1B 95.22(8) 15_554 27 ? 
Ce2 S2 Ce1B 95.22(8) 14_654 27 ? 
Ce1A S2 S1 97.9(2) 15_554 15_554 ? 
Fe1 S2 S1 103.60(9) 25 15_554 ? 
Ce1B S2 S1 107.2(3) 15_554 15_554 ? 
Ce2 S2 S1 58.06(7) 15_554 15_554 ? 
Ce2 S2 S1 120.04(10) 14_654 15_554 ? 
Ce1A S2 S1 54.11(14) 27 15_554 ? 
Ce1C S2 S1 111.0(2) 15_554 15_554 ? 
Ce1B S2 S1 48.4(2) 27 15_554 ? 
Ce1A S2 S1 97.9(2) 15_554 14_654 ? 
Fe1 S2 S1 103.60(9) 25 14_654 ? 
Ce1B S2 S1 107.2(3) 15_554 14_654 ? 
Ce2 S2 S1 120.04(10) 15_554 14_654 ? 
Ce2 S2 S1 58.06(7) 14_654 14_654 ? 
Ce1A S2 S1 54.11(14) 27 14_654 ? 
Ce1C S2 S1 111.0(2) 15_554 14_654 ? 
Ce1B S2 S1 48.4(2) 27 14_654 ? 
S1 S2 S1 62.95(13) 15_554 14_654 ? 
Fe2 S2 Ce1C 68.6(2) 25 27 ? 
Fe1 S2 Ce1C 141.2(2) 25 27 ? 
Ce2 S2 Ce1C 94.69(7) 15_554 27 ? 
Ce2 S2 Ce1C 94.69(7) 14_654 27 ? 
S1 S2 Ce1C 45.78(16) 15_554 27 ? 
S1 S2 Ce1C 45.78(16) 14_654 27 ? 
Fe2 S2 S3 102.81(9) 25 2_655 ? 
Ce1A S2 S3 116.8(2) 15_554 2_655 ? 
Ce1B S2 S3 107.8(3) 15_554 2_655 ? 
Ce2 S2 S3 115.96(10) 15_554 2_655 ? 
Ce2 S2 S3 52.94(5) 14_654 2_655 ? 
Ce1A S2 S3 147.78(5) 27 2_655 ? 
Ce1C S2 S3 104.0(2) 15_554 2_655 ? 
Ce1B S2 S3 148.07(5) 27 2_655 ? 
S1 S2 S3 145.00(9) 15_554 2_655 ? 
S1 S2 S3 105.56(7) 14_654 2_655 ? 
Ce1C S2 S3 147.62(6) 27 2_655 ? 
Fe2 S2 S3 102.81(9) 25 3_665 ? 
Ce1A S2 S3 116.8(2) 15_554 3_665 ? 
Ce1B S2 S3 107.8(3) 15_554 3_665 ? 
Ce2 S2 S3 52.94(5) 15_554 3_665 ? 
Ce2 S2 S3 115.96(10) 14_654 3_665 ? 
Ce1A S2 S3 147.78(5) 27 3_665 ? 
Ce1C S2 S3 104.0(2) 15_554 3_665 ? 
Ce1B S2 S3 148.07(5) 27 3_665 ? 
S1 S2 S3 105.56(7) 15_554 3_665 ? 
S1 S2 S3 145.00(9) 14_654 3_665 ? 
Ce1C S2 S3 147.62(6) 27 3_665 ? 
S3 S2 S3 63.68(9) 2_655 3_665 ? 
Fe1 S3 Ce2 175.60(12) 25 31_655 ? 
Fe1 S3 Ce3 88.13(6) 25 3_665 ? 
Ce2 S3 Ce3 93.42(5) 31_655 3_665 ? 
Fe1 S3 Ce3 88.13(6) 25 2_655 ? 
Ce2 S3 Ce3 93.42(5) 31_655 2_655 ? 
Ce3 S3 Ce3 138.41(9) 3_665 2_655 ? 
Fe1 S3 Ce2 83.35(9) 25 13_544 ? 
Ce2 S3 Ce2 92.25(7) 31_655 13_544 ? 
Ce3 S3 Ce2 110.32(4) 3_665 13_544 ? 
Ce3 S3 Ce2 110.32(4) 2_655 13_544 ? 
Fe1 S3 S4 110.94(6) 25 15_654 ? 
Ce2 S3 S4 67.02(5) 31_655 15_654 ? 
Ce3 S3 S4 53.18(4) 3_665 15_654 ? 
Ce3 S3 S4 159.51(9) 2_655 15_654 ? 
Ce2 S3 S4 66.42(4) 13_544 15_654 ? 
Fe1 S3 S4 110.94(6) 25 33_545 ? 
Ce2 S3 S4 67.02(5) 31_655 33_545 ? 
Ce3 S3 S4 159.51(9) 3_665 33_545 ? 
Ce3 S3 S4 53.18(4) 2_655 33_545 ? 
Ce2 S3 S4 66.42(4) 13_544 33_545 ? 
S4 S3 S4 110.47(10) 15_654 33_545 ? 
Fe1 S3 S2 48.44(7) 25 3_665 ? 
Ce2 S3 S2 128.30(7) 31_655 3_665 ? 
Ce3 S3 S2 71.82(5) 3_665 3_665 ? 
Ce3 S3 S2 130.70(8) 2_655 3_665 ? 
Ce2 S3 S2 52.02(5) 13_544 3_665 ? 
S4 S3 S2 64.70(5) 15_654 3_665 ? 
S4 S3 S2 114.82(7) 33_545 3_665 ? 
Fe1 S3 S2 48.44(7) 25 2_655 ? 
Ce2 S3 S2 128.30(7) 31_655 2_655 ? 
Ce3 S3 S2 130.70(8) 3_665 2_655 ? 
Ce3 S3 S2 71.82(5) 2_655 2_655 ? 
Ce2 S3 S2 52.02(5) 13_544 2_655 ? 
S4 S3 S2 114.82(7) 15_654 2_655 ? 
S4 S3 S2 64.70(5) 33_545 2_655 ? 
S2 S3 S2 62.08(10) 3_665 2_655 ? 
Fe1 S3 I1 83.06(9) 25 7 ? 
Ce2 S3 I1 101.34(7) 31_655 7 ? 
Ce3 S3 I1 69.22(4) 3_665 7 ? 
Ce3 S3 I1 69.22(4) 2_655 7 ? 
Ce2 S3 I1 166.42(8) 13_544 7 ? 
S4 S3 I1 118.96(5) 15_654 7 ? 
S4 S3 I1 118.96(5) 33_545 7 ? 
S2 S3 I1 117.27(6) 3_665 7 ? 
S2 S3 I1 117.27(6) 2_655 7 ? 
Ce2 S3 S3 141.70(3) 31_655 2_655 ? 
Ce3 S3 S3 50.02(5) 3_665 2_655 ? 
Ce3 S3 S3 107.00(5) 2_655 2_655 ? 
Ce2 S3 S3 109.59(4) 13_544 2_655 ? 
S4 S3 S3 92.75(5) 15_654 2_655 ? 
S4 S3 S3 150.39(4) 33_545 2_655 ? 
S2 S3 S3 58.16(5) 3_665 2_655 ? 
S2 S3 S3 89.32(5) 2_655 2_655 ? 
I1 S3 S3 59.11(3) 7 2_655 ? 
Ce2 S3 S3 141.70(3) 31_655 3_665 ? 
Ce3 S3 S3 107.00(5) 3_665 3_665 ? 
Ce3 S3 S3 50.02(5) 2_655 3_665 ? 
Ce2 S3 S3 109.59(4) 13_544 3_665 ? 
S4 S3 S3 150.39(4) 15_654 3_665 ? 
S4 S3 S3 92.75(5) 33_545 3_665 ? 
S2 S3 S3 89.32(5) 3_665 3_665 ? 
S2 S3 S3 58.16(5) 2_655 3_665 ? 
I1 S3 S3 59.11(3) 7 3_665 ? 
S3 S3 S3 60.0 2_655 3_665 ? 
Fe1 S3 S5 133.84(7) 25 7 ? 
Ce2 S3 S5 49.20(4) 31_655 7 ? 
Ce3 S3 S5 49.58(3) 3_665 7 ? 
Ce3 S3 S5 110.58(7) 2_655 7 ? 
Ce2 S3 S5 124.11(7) 13_544 7 ? 
S4 S3 S5 61.84(4) 15_654 7 ? 
S4 S3 S5 114.00(6) 33_545 7 ? 
S2 S3 S5 116.50(5) 3_665 7 ? 
S2 S3 S5 176.10(8) 2_655 7 ? 
I1 S3 S5 66.62(5) 7 7 ? 
S3 S3 S5 92.82(3) 2_655 7 ? 
S3 S3 S5 125.73(5) 3_665 7 ? 
Fe1 S3 S5 133.84(7) 25 26 ? 
Ce2 S3 S5 49.20(4) 31_655 26 ? 
Ce3 S3 S5 110.58(7) 3_665 26 ? 
Ce3 S3 S5 49.58(3) 2_655 26 ? 
Ce2 S3 S5 124.11(7) 13_544 26 ? 
S4 S3 S5 114.00(6) 15_654 26 ? 
S4 S3 S5 61.84(4) 33_545 26 ? 
S2 S3 S5 176.10(8) 3_665 26 ? 
S2 S3 S5 116.50(5) 2_655 26 ? 
I1 S3 S5 66.62(5) 7 26 ? 
S3 S3 S5 125.73(5) 2_655 26 ? 
S3 S3 S5 92.82(4) 3_665 26 ? 
S5 S3 S5 64.67(4) 7 26 ? 
Ce1E S4 Ce3 99.5(8) 20_556 7_445 ? 
Ce1E S4 Ce3 86.2(8) 3 7_445 ? 
Ce1F S4 Ce3 103.5(5) 20_556 7_445 ? 
Ce1F S4 Ce3 82.8(5) 3 7_445 ? 
Ce1C S4 Ce3 87.88(9) 3 7_445 ? 
Ce1C S4 Ce3 95.72(11) 20_556 7_445 ? 
Ce1E S4 Ce3 86.2(8) 20_556 33_545 ? 
Ce1E S4 Ce3 99.5(8) 3 33_545 ? 
Ce1F S4 Ce3 82.8(5) 20_556 33_545 ? 
Ce1F S4 Ce3 103.5(5) 3 33_545 ? 
Ce1C S4 Ce3 95.72(11) 3 33_545 ? 
Ce1C S4 Ce3 87.89(9) 20_556 33_545 ? 
Ce3 S4 Ce3 173.31(16) 7_445 33_545 ? 
Ce3 S4 Ce1D 94.2(8) 7_445 20_556 ? 
Ce3 S4 Ce1D 91.6(8) 33_545 20_556 ? 
Ce3 S4 Ce1D 91.6(8) 7_445 3 ? 
Ce3 S4 Ce1D 94.2(8) 33_545 3 ? 
Ce3 S4 Ce1B 94.10(14) 7_445 20_556 ? 
Ce3 S4 Ce1B 89.03(11) 33_545 20_556 ? 
Ce3 S4 Ce1B 89.02(11) 7_445 3 ? 
Ce3 S4 Ce1B 94.10(14) 33_545 3 ? 
Ce3 S4 Ce1G 100.67(17) 7_445 20_556 ? 
Ce3 S4 Ce1G 85.97(16) 33_545 20_556 ? 
Ce3 S4 Ce1G 85.96(16) 7_445 3 ? 
Ce3 S4 Ce1G 100.67(16) 33_545 3 ? 
Ce2 S5 Ce2 179.95(10) 25 15_554 ? 
Ce2 S5 Ce3 90.96(3) 25 15_554 ? 
Ce2 S5 Ce3 89.02(3) 15_554 15_554 ? 
Ce2 S5 Ce3 89.02(3) 25 25 ? 
Ce2 S5 Ce3 90.96(3) 15_554 25 ? 
Ce3 S5 Ce3 123.66(9) 15_554 25 ? 
Ce2 S5 Ce1A 88.82(9) 25 25 ? 
Ce2 S5 Ce1A 91.23(9) 15_554 25 ? 
Ce3 S5 Ce1A 94.73(18) 15_554 25 ? 
Ce3 S5 Ce1A 141.59(18) 25 25 ? 
Ce2 S5 Ce1A 91.23(9) 25 13_544 ? 
Ce2 S5 Ce1A 88.82(9) 15_554 13_544 ? 
Ce3 S5 Ce1A 141.58(18) 15_554 13_544 ? 
Ce3 S5 Ce1A 94.73(18) 25 13_544 ? 
Ce2 S5 S1 58.80(6) 25 25 ? 
Ce2 S5 S1 121.22(7) 15_554 25 ? 
Ce3 S5 S1 149.08(6) 15_554 25 ? 
Ce3 S5 S1 55.72(5) 25 25 ? 
Ce1A S5 S1 91.15(15) 25 25 ? 
Ce1A S5 S1 53.69(12) 13_544 25 ? 
Ce2 S5 S1 121.22(7) 25 15_554 ? 
Ce2 S5 S1 58.80(6) 15_554 15_554 ? 
Ce3 S5 S1 55.72(5) 15_554 15_554 ? 
Ce3 S5 S1 149.08(6) 25 15_554 ? 
Ce1A S5 S1 53.68(12) 25 15_554 ? 
Ce1A S5 S1 91.14(15) 13_544 15_554 ? 
S1 S5 S1 143.64(11) 25 15_554 ? 
Ce2 S5 Ce1B 87.45(6) 25 25 ? 
Ce2 S5 Ce1B 92.60(7) 15_554 25 ? 
Ce3 S5 Ce1B 86.1(3) 15_554 25 ? 
Ce3 S5 Ce1B 150.1(3) 25 25 ? 
S1 S5 Ce1B 97.8(3) 25 25 ? 
S1 S5 Ce1B 48.4(2) 15_554 25 ? 
Ce2 S5 Ce1B 92.60(7) 25 13_544 ? 
Ce2 S5 Ce1B 87.45(6) 15_554 13_544 ? 
Ce3 S5 Ce1B 150.1(3) 15_554 13_544 ? 
Ce3 S5 Ce1B 86.1(3) 25 13_544 ? 
S1 S5 Ce1B 48.4(2) 25 13_544 ? 
S1 S5 Ce1B 97.8(3) 15_554 13_544 ? 
Ce2 S5 Ce1C 87.41(7) 25 25 ? 
Ce2 S5 Ce1C 92.64(7) 15_554 25 ? 
Ce3 S5 Ce1C 82.2(2) 15_554 25 ? 
Ce3 S5 Ce1C 154.0(2) 25 25 ? 
S1 S5 Ce1C 101.1(2) 25 25 ? 
S1 S5 Ce1C 45.85(16) 15_554 25 ? 
Ce2 S5 Ce1C 92.64(7) 25 13_544 ? 
Ce2 S5 Ce1C 87.40(7) 15_554 13_544 ? 
Ce3 S5 Ce1C 154.0(2) 15_554 13_544 ? 
Ce3 S5 Ce1C 82.2(2) 25 13_544 ? 
S1 S5 Ce1C 45.85(16) 25 13_544 ? 
S1 S5 Ce1C 101.1(2) 15_554 13_544 ? 
Ce2 S5 S2 131.04(8) 25 2_655 ? 
Ce2 S5 S2 49.01(4) 15_554 2_655 ? 
Ce3 S5 S2 112.55(5) 15_554 2_655 ? 
Ce3 S5 S2 109.13(5) 25 2_655 ? 
Ce1A S5 S2 48.75(13) 25 2_655 ? 
S1 S5 S2 94.01(7) 25 2_655 ? 
S1 S5 S2 57.32(8) 15_554 2_655 ? 
Ce1B S5 S2 54.23(19) 25 2_655 ? 
Ce1B S5 S2 46.33(15) 13_544 2_655 ? 
Ce1C S5 S2 56.47(14) 25 2_655 ? 
Ce1C S5 S2 48.37(14) 13_544 2_655 ? 
Ce2 S5 S2 49.01(4) 25 20 ? 
Ce2 S5 S2 131.04(8) 15_554 20 ? 
Ce3 S5 S2 109.13(5) 15_554 20 ? 
Ce3 S5 S2 112.55(5) 25 20 ? 
Ce1A S5 S2 48.75(14) 13_544 20 ? 
S1 S5 S2 57.33(8) 25 20 ? 
S1 S5 S2 94.01(7) 15_554 20 ? 
Ce1B S5 S2 46.33(15) 25 20 ? 
Ce1B S5 S2 54.2(2) 13_544 20 ? 
Ce1C S5 S2 48.37(14) 25 20 ? 
Ce1C S5 S2 56.47(14) 13_544 20 ? 
S2 S5 S2 82.25(9) 2_655 20 ? 
S3 I1 S3 180.00(4) 27_445 15_554 ? 
S3 I1 S3 61.78(6) 27_445 26_455 ? 
S3 I1 S3 118.22(6) 15_554 26_455 ? 
S3 I1 S3 118.22(6) 27_445 14_544 ? 
S3 I1 S3 61.78(6) 15_554 14_544 ? 
S3 I1 S3 180.00(9) 26_455 14_544 ? 
S3 I1 S3 61.78(6) 27_445 25 ? 
S3 I1 S3 118.22(6) 15_554 25 ? 
S3 I1 S3 61.78(6) 26_455 25 ? 
S3 I1 S3 118.22(6) 14_544 25 ? 
S3 I1 S3 118.22(6) 27_445 13_444 ? 
S3 I1 S3 61.78(6) 15_554 13_444 ? 
S3 I1 S3 118.22(6) 26_455 13_444 ? 
S3 I1 S3 61.78(6) 14_544 13_444 ? 
S3 I1 S3 180.00(6) 25 13_444 ? 
S3 I1 Ce3 133.799(9) 27_445 13_444 ? 
S3 I1 Ce3 46.201(9) 15_554 13_444 ? 
S3 I1 Ce3 133.799(9) 26_455 13_444 ? 
S3 I1 Ce3 46.201(9) 14_544 13_444 ? 
S3 I1 Ce3 87.19(4) 25 13_444 ? 
S3 I1 Ce3 92.81(4) 13_444 13_444 ? 
S3 I1 Ce3 46.201(9) 27_445 25 ? 
S3 I1 Ce3 133.799(9) 15_554 25 ? 
S3 I1 Ce3 46.201(9) 26_455 25 ? 
S3 I1 Ce3 133.799(9) 14_544 25 ? 
S3 I1 Ce3 92.81(4) 25 25 ? 
S3 I1 Ce3 87.19(4) 13_444 25 ? 
Ce3 I1 Ce3 180.000(19) 13_444 25 ? 
S3 I1 Ce3 133.800(9) 27_445 14_544 ? 
S3 I1 Ce3 46.200(9) 15_554 14_544 ? 
S3 I1 Ce3 87.20(4) 26_455 14_544 ? 
S3 I1 Ce3 92.80(4) 14_544 14_544 ? 
S3 I1 Ce3 133.800(9) 25 14_544 ? 
S3 I1 Ce3 46.200(9) 13_444 14_544 ? 
Ce3 I1 Ce3 92.393(17) 13_444 14_544 ? 
Ce3 I1 Ce3 87.607(17) 25 14_544 ? 
S3 I1 Ce3 46.200(9) 27_445 26_455 ? 
S3 I1 Ce3 133.800(9) 15_554 26_455 ? 
S3 I1 Ce3 92.80(4) 26_455 26_455 ? 
S3 I1 Ce3 87.20(4) 14_544 26_455 ? 
S3 I1 Ce3 46.200(9) 25 26_455 ? 
S3 I1 Ce3 133.800(9) 13_444 26_455 ? 
Ce3 I1 Ce3 87.607(17) 13_444 26_455 ? 
Ce3 I1 Ce3 92.393(17) 25 26_455 ? 
Ce3 I1 Ce3 180.000(14) 14_544 26_455 ? 
S3 I1 Ce3 92.80(4) 27_445 27_445 ? 
S3 I1 Ce3 87.20(4) 15_554 27_445 ? 
S3 I1 Ce3 46.200(9) 26_455 27_445 ? 
S3 I1 Ce3 133.800(9) 14_544 27_445 ? 
S3 I1 Ce3 46.200(9) 25 27_445 ? 
S3 I1 Ce3 133.800(9) 13_444 27_445 ? 
Ce3 I1 Ce3 87.606(17) 13_444 27_445 ? 
Ce3 I1 Ce3 92.394(17) 25 27_445 ? 
Ce3 I1 Ce3 87.608(17) 14_544 27_445 ? 
Ce3 I1 Ce3 92.392(18) 26_455 27_445 ? 
S3 I1 Ce3 87.20(4) 27_445 15_554 ? 
S3 I1 Ce3 92.80(4) 15_554 15_554 ? 
S3 I1 Ce3 133.800(9) 26_455 15_554 ? 
S3 I1 Ce3 46.200(9) 14_544 15_554 ? 
S3 I1 Ce3 133.800(9) 25 15_554 ? 
S3 I1 Ce3 46.200(9) 13_444 15_554 ? 
Ce3 I1 Ce3 92.394(17) 13_444 15_554 ? 
Ce3 I1 Ce3 87.606(17) 25 15_554 ? 
Ce3 I1 Ce3 92.392(18) 14_544 15_554 ? 
Ce3 I1 Ce3 87.608(17) 26_455 15_554 ? 
Ce3 I1 Ce3 180.000(19) 27_445 15_554 ? 
 
_diffrn_measured_fraction_theta_max    1.000 
_diffrn_reflns_theta_full              27.00 
_diffrn_measured_fraction_theta_full   1.000 
_refine_diff_density_max    4.170 
_refine_diff_density_min   -2.466 
_refine_diff_density_rms    0.339 
